# Supplementary material for: From chromatogram to analyte to metabolite. How to pick horses for courses from the massive web resources for mass spectral plant metabolomics
Source: PubMed Central journal article supplement (PMC5499862; doi:10.1093/gigascience/gix037), 2017-05-17

# GigaScience

## From chromatogram to analyte to metabolite. How to pick horses for courses from the massive web-resources for mass spectral plant metabolomics --Manuscript Draft--

|                                                      |                                                                                                                                                                                                                                                                                                                                                                                                                                                                                                                                                                                                                                                                                                                                                                                                                                                                                                                                                                                                                                                                                                                                                                                                                                                                                                                                                                                                                                                                                                                                                                     |                             |
|------------------------------------------------------|---------------------------------------------------------------------------------------------------------------------------------------------------------------------------------------------------------------------------------------------------------------------------------------------------------------------------------------------------------------------------------------------------------------------------------------------------------------------------------------------------------------------------------------------------------------------------------------------------------------------------------------------------------------------------------------------------------------------------------------------------------------------------------------------------------------------------------------------------------------------------------------------------------------------------------------------------------------------------------------------------------------------------------------------------------------------------------------------------------------------------------------------------------------------------------------------------------------------------------------------------------------------------------------------------------------------------------------------------------------------------------------------------------------------------------------------------------------------------------------------------------------------------------------------------------------------|-----------------------------|
| <b>Manuscript Number:</b>                            | GIGA-D-17-00039R1                                                                                                                                                                                                                                                                                                                                                                                                                                                                                                                                                                                                                                                                                                                                                                                                                                                                                                                                                                                                                                                                                                                                                                                                                                                                                                                                                                                                                                                                                                                                                   |                             |
| <b>Full Title:</b>                                   | From chromatogram to analyte to metabolite. How to pick horses for courses from the massive web-resources for mass spectral plant metabolomics                                                                                                                                                                                                                                                                                                                                                                                                                                                                                                                                                                                                                                                                                                                                                                                                                                                                                                                                                                                                                                                                                                                                                                                                                                                                                                                                                                                                                      |                             |
| <b>Article Type:</b>                                 | Review                                                                                                                                                                                                                                                                                                                                                                                                                                                                                                                                                                                                                                                                                                                                                                                                                                                                                                                                                                                                                                                                                                                                                                                                                                                                                                                                                                                                                                                                                                                                                              |                             |
| <b>Funding Information:</b>                          | Conselho Nacional de Desenvolvimento Científico e Tecnológico (246605/2012-0)                                                                                                                                                                                                                                                                                                                                                                                                                                                                                                                                                                                                                                                                                                                                                                                                                                                                                                                                                                                                                                                                                                                                                                                                                                                                                                                                                                                                                                                                                       | Mr. Leonardo Perez de Souza |
|                                                      | Max-Planck-Gesellschaft                                                                                                                                                                                                                                                                                                                                                                                                                                                                                                                                                                                                                                                                                                                                                                                                                                                                                                                                                                                                                                                                                                                                                                                                                                                                                                                                                                                                                                                                                                                                             | Not applicable              |
| <b>Abstract:</b>                                     | <p>The grand challenge currently facing metabolomics is the expansion of the coverage of the metabolome from a minor percentage of the metabolic complement of the cell towards the level of coverage afforded by other post-genomic technologies such as transcriptomics and proteomics. In plants this problem is exacerbated by the sheer diversity of chemicals that constitute the metabolome with the number of metabolites in the plant kingdom generally being considered to be in excess of 200 000. In this review we focus on web-resources that can be exploited in order to improve analyte and ultimately metabolite identification and quantification. There is a wide range of available software that not only aids in this but also in the related area of peak alignment, however, for the uninitiated choosing which program to use is a daunting task. For this reason we provide an overview of the pros and cons of the software as well as comments regarding the level of programming skills required to effectively exploit their basic functions. In addition the torrent of available genome and transcriptome sequences that followed the advent of next-generation sequencing has opened up further valuable resources for metabolite identification. All things considered, we posit that only via a continued communal sharing of information such as that deposited in the databases described within the article are we likely to be able to make significant headway towards improving our coverage of the plant metabolome.</p> |                             |
| <b>Corresponding Author:</b>                         | Alisdair Robert Fernie<br><br>GERMANY                                                                                                                                                                                                                                                                                                                                                                                                                                                                                                                                                                                                                                                                                                                                                                                                                                                                                                                                                                                                                                                                                                                                                                                                                                                                                                                                                                                                                                                                                                                               |                             |
| <b>Corresponding Author Secondary Information:</b>   |                                                                                                                                                                                                                                                                                                                                                                                                                                                                                                                                                                                                                                                                                                                                                                                                                                                                                                                                                                                                                                                                                                                                                                                                                                                                                                                                                                                                                                                                                                                                                                     |                             |
| <b>Corresponding Author's Institution:</b>           |                                                                                                                                                                                                                                                                                                                                                                                                                                                                                                                                                                                                                                                                                                                                                                                                                                                                                                                                                                                                                                                                                                                                                                                                                                                                                                                                                                                                                                                                                                                                                                     |                             |
| <b>Corresponding Author's Secondary Institution:</b> |                                                                                                                                                                                                                                                                                                                                                                                                                                                                                                                                                                                                                                                                                                                                                                                                                                                                                                                                                                                                                                                                                                                                                                                                                                                                                                                                                                                                                                                                                                                                                                     |                             |
| <b>First Author:</b>                                 | Leonardo Perez de Souza                                                                                                                                                                                                                                                                                                                                                                                                                                                                                                                                                                                                                                                                                                                                                                                                                                                                                                                                                                                                                                                                                                                                                                                                                                                                                                                                                                                                                                                                                                                                             |                             |
| <b>First Author Secondary Information:</b>           |                                                                                                                                                                                                                                                                                                                                                                                                                                                                                                                                                                                                                                                                                                                                                                                                                                                                                                                                                                                                                                                                                                                                                                                                                                                                                                                                                                                                                                                                                                                                                                     |                             |
| <b>Order of Authors:</b>                             | Leonardo Perez de Souza                                                                                                                                                                                                                                                                                                                                                                                                                                                                                                                                                                                                                                                                                                                                                                                                                                                                                                                                                                                                                                                                                                                                                                                                                                                                                                                                                                                                                                                                                                                                             |                             |
|                                                      | Thomas Naake                                                                                                                                                                                                                                                                                                                                                                                                                                                                                                                                                                                                                                                                                                                                                                                                                                                                                                                                                                                                                                                                                                                                                                                                                                                                                                                                                                                                                                                                                                                                                        |                             |
|                                                      | Takayuki Tohge                                                                                                                                                                                                                                                                                                                                                                                                                                                                                                                                                                                                                                                                                                                                                                                                                                                                                                                                                                                                                                                                                                                                                                                                                                                                                                                                                                                                                                                                                                                                                      |                             |
|                                                      | Alisdair Robert Fernie                                                                                                                                                                                                                                                                                                                                                                                                                                                                                                                                                                                                                                                                                                                                                                                                                                                                                                                                                                                                                                                                                                                                                                                                                                                                                                                                                                                                                                                                                                                                              |                             |
| <b>Order of Authors Secondary Information:</b>       |                                                                                                                                                                                                                                                                                                                                                                                                                                                                                                                                                                                                                                                                                                                                                                                                                                                                                                                                                                                                                                                                                                                                                                                                                                                                                                                                                                                                                                                                                                                                                                     |                             |
| <b>Response to Reviewers:</b>                        | <p>Reviewer reports:<br/>Reviewer #1: This review has been well-written already, but I have some comments as listed below which should be considered by authors.</p> <p>1. The paper is too long. Should all of the local- or web applications that you introduced be highlighted in this paper? As you mentioned in the future perspective, many of the</p>                                                                                                                                                                                                                                                                                                                                                                                                                                                                                                                                                                                                                                                                                                                                                                                                                                                                                                                                                                                                                                                                                                                                                                                                        |                             |

tools are already 'out of dates', never updated for a long time, and never used for metabolomics research anymore. But I really feel a 'value' in this paper especially for an 'education' purpose too. Therefore, I highly would like authors to add 'the date of last update' for each tool (or as much as possible) cited in this manuscript. As you know, the evaluation of GO analysis tools is now performed like that:  
[http://www.nature.com/nmeth/journal/v13/n9/full/nmeth.3963.html?WT.ec\\_id=NMETH-201609&spMailingID=52180959&spUserID=MzcxMzk3NDY5OTES1&spJobID=985584826&spReportId=OTg1NTg0ODI2S0](http://www.nature.com/nmeth/journal/v13/n9/full/nmeth.3963.html?WT.ec_id=NMETH-201609&spMailingID=52180959&spUserID=MzcxMzk3NDY5OTES1&spJobID=985584826&spReportId=OTg1NTg0ODI2S0)

Reply: As suggested by both reviewers, the problem of outdated tools available online is a major one. To highlight this in the paper we included a sentence in the background pointing out the importance of evaluating the current state of each resource and referred to the "last updated" dates included in supplementary table 1.

Regarding the extension of the manuscript, we briefly described even outdated tools so that the reader can have an idea of the previous developments leading to the current state-of-the-art in each respective step of the metabolomics pipeline.

I know your review is not for the evaluation. But you have to add the information of 'recommended-', 'activity-', 'special interest' or 'outstanding interest' as a lot of reviews do. See like COCB reviews:

<http://www.sciencedirect.com/science/journal/13675931/36/supp/C>.

Reply: Included in supplementary table.

2. Please transfer ms2lda and ms2analyzer to 'annotation' section.

Reply: Transferred

3. I think MS-DIAL is not only for DIA-MS, but also all other techniques such as GC/MS and DDA.

Reply: Yes, indeed it is. We added a sentence to highlight this point.

4. Please transfer mathdamp and spectconnect to data processing section.

Reply: Transferred

5. In metabolite annotation section, cite CASMI, and see MS-FINDER and CSI-IOKR are also interesting tools which have been recently developed.

Reply: Added to annotation section, thanks for the suggestion!

6. UNPD database should be cited as natural product database.

Reply: Added to database section.

7. You said 'Metline currently contains 961,829 molecules'. Ok my question is: how many records do contain MS/MS information?

Reply: Included in text: "METLIN currently contains 961,829 molecules from which 200,000 have in silico MS/MS data. Additionally over 14,000 metabolites were analyzed and mass spectra at multiple collision energies in positive and negative ionization mode obtained".

I am looking forward to seeing your improved manuscript.

Thanks,

Reviewer #2: This is a very comprehensive and complete review of available tools and databases available to perform plant metabolomic analysis.

My only concern is that it may be daunting for the reader to grasp the breadth and depth of all the possibilities available for her/him in the current format. The figure helps to get a broad view of the different steps required to perform this type of analysis. I suggest to include a table with available tools for the different steps in the data analysis pipeline and indicating the type of tool (GUI, command line) language (R, Java etc).

Reply: A table with the relevant description of all tools mentioned in the text was provided in supplementary data.

Other than that I only have some minor comments/corrections.

Reviewer #2:

|                                                                                                                                        |                                                                                                                                                                                                                                                                                                                                                                                                                                                                                                                                                                                                                                                                                                                                                                                                                                                                                                                                                                                                                                                                                                                                                                                                                                                                                                                                                                                                                                                                                                                                                                                                                                                                                                                                                                                                                                                                                                                                                                                                                                                                                                                                                                                                                                                                                                                                                                                                                                                                                                                                                                                                                                                                                                                                                                                                                                                                                   |
|----------------------------------------------------------------------------------------------------------------------------------------|-----------------------------------------------------------------------------------------------------------------------------------------------------------------------------------------------------------------------------------------------------------------------------------------------------------------------------------------------------------------------------------------------------------------------------------------------------------------------------------------------------------------------------------------------------------------------------------------------------------------------------------------------------------------------------------------------------------------------------------------------------------------------------------------------------------------------------------------------------------------------------------------------------------------------------------------------------------------------------------------------------------------------------------------------------------------------------------------------------------------------------------------------------------------------------------------------------------------------------------------------------------------------------------------------------------------------------------------------------------------------------------------------------------------------------------------------------------------------------------------------------------------------------------------------------------------------------------------------------------------------------------------------------------------------------------------------------------------------------------------------------------------------------------------------------------------------------------------------------------------------------------------------------------------------------------------------------------------------------------------------------------------------------------------------------------------------------------------------------------------------------------------------------------------------------------------------------------------------------------------------------------------------------------------------------------------------------------------------------------------------------------------------------------------------------------------------------------------------------------------------------------------------------------------------------------------------------------------------------------------------------------------------------------------------------------------------------------------------------------------------------------------------------------------------------------------------------------------------------------------------------------|
|                                                                                                                                        | <p>I 38: add full stop or semicolon after Arabidopsis Thaliana.<br/>Reply: Done<br/>Reviewer #2:</p> <p>I 78: change to: plant metabolic responses will be best exploited in the future<br/>Reply: Done<br/>Reviewer #2:</p> <p>I 231 to 236: Break down this sentence in two. Too long to follow properly.<br/>Reply: Done<br/>Reviewer #2:</p> <p>I 308: iterates instead of iterating<br/>Reply: Done<br/>Reviewer #2:</p> <p>I 440: full stop after metabolites<br/>Reply: Done<br/>Reviewer #2:</p> <p>I 463: describe SDF files.<br/>Reply: Done<br/>Reviewer #2:</p> <p>I 575: Also include <a href="http://fiehnlab.ucdavis.edu/projects/fiehnlib">http://fiehnlab.ucdavis.edu/projects/fiehnlib</a><br/>Reply: We previously did not include fiehnLib since we could not get access to the spectral data from the library. However we have added a comment to that effect in the revised manuscript.<br/>Reviewer #2:</p> <p>I 731: PlantCyc only has 22 species.<br/>Reply: The plant metabolic network (PMN) includes single-species/taxon databases on 20 individual species, but at the center of PMN is PlantCyc with over 800 pathways of 350 plant species (<a href="http://www.plantcyc.org/about/plantcyc-species">http://www.plantcyc.org/about/plantcyc-species</a>).<br/>Reviewer #2:</p> <p>I 743: Brachypodium instead of Bracypodium.<br/>Reply: Done<br/>Reviewer #2:</p> <p>I 766: maybe cite here services that allow conversion between different types of metabolite chemical information like the chemical translation service:<br/><a href="http://cts.fiehnlab.ucdavis.edu/">http://cts.fiehnlab.ucdavis.edu/</a><br/>Reply: Fixed. It was only cited with the acronym CTS.</p> <p>I 818: worth commenting here on persistence of web services and algorithms over time. Is very common that tools are made and then no longer maintained and supported. As an example, the muscleproject.org website, published in 2015, is not available. R packages in this regard do provide a better way to curate software through bioconductor and CRAN. (Nice review about this here: <a href="http://www.sciencedirect.com/science/article/pii/S1360138516301996">http://www.sciencedirect.com/science/article/pii/S1360138516301996</a>)<br/>Reply: We added a small section in the background pointing the issue and referring to the importance of the "update dates" provided in supplementary table. And briefly discussed the importance of repositories to keep these tools.<br/>--<br/>Please also take a moment to check our website at <a href="http://giga.edmgr.com/l.asp?i=8865&amp;l=1KH5AEGW">http://giga.edmgr.com/l.asp?i=8865&amp;l=1KH5AEGW</a> for any additional comments that were saved as attachments. Please note that as GigaScience has a policy of open peer review, you will be able to see the names of the reviewers.</p> |
| <b>Additional Information:</b>                                                                                                         |                                                                                                                                                                                                                                                                                                                                                                                                                                                                                                                                                                                                                                                                                                                                                                                                                                                                                                                                                                                                                                                                                                                                                                                                                                                                                                                                                                                                                                                                                                                                                                                                                                                                                                                                                                                                                                                                                                                                                                                                                                                                                                                                                                                                                                                                                                                                                                                                                                                                                                                                                                                                                                                                                                                                                                                                                                                                                   |
| <b>Question</b>                                                                                                                        | <b>Response</b>                                                                                                                                                                                                                                                                                                                                                                                                                                                                                                                                                                                                                                                                                                                                                                                                                                                                                                                                                                                                                                                                                                                                                                                                                                                                                                                                                                                                                                                                                                                                                                                                                                                                                                                                                                                                                                                                                                                                                                                                                                                                                                                                                                                                                                                                                                                                                                                                                                                                                                                                                                                                                                                                                                                                                                                                                                                                   |
| Are you submitting this manuscript to a special series or article collection?                                                          | Yes                                                                                                                                                                                                                                                                                                                                                                                                                                                                                                                                                                                                                                                                                                                                                                                                                                                                                                                                                                                                                                                                                                                                                                                                                                                                                                                                                                                                                                                                                                                                                                                                                                                                                                                                                                                                                                                                                                                                                                                                                                                                                                                                                                                                                                                                                                                                                                                                                                                                                                                                                                                                                                                                                                                                                                                                                                                                               |
| Please select an option from the menu: as follow-up to "Are you submitting this manuscript to a special series or article collection?" | Functional Metagenomics                                                                                                                                                                                                                                                                                                                                                                                                                                                                                                                                                                                                                                                                                                                                                                                                                                                                                                                                                                                                                                                                                                                                                                                                                                                                                                                                                                                                                                                                                                                                                                                                                                                                                                                                                                                                                                                                                                                                                                                                                                                                                                                                                                                                                                                                                                                                                                                                                                                                                                                                                                                                                                                                                                                                                                                                                                                           |
| <b>Experimental design and statistics</b>                                                                                              | No                                                                                                                                                                                                                                                                                                                                                                                                                                                                                                                                                                                                                                                                                                                                                                                                                                                                                                                                                                                                                                                                                                                                                                                                                                                                                                                                                                                                                                                                                                                                                                                                                                                                                                                                                                                                                                                                                                                                                                                                                                                                                                                                                                                                                                                                                                                                                                                                                                                                                                                                                                                                                                                                                                                                                                                                                                                                                |

|                                                                                                                                                                                                                                                                                                                                                                                                                                                                                                                                     |                       |
|-------------------------------------------------------------------------------------------------------------------------------------------------------------------------------------------------------------------------------------------------------------------------------------------------------------------------------------------------------------------------------------------------------------------------------------------------------------------------------------------------------------------------------------|-----------------------|
| <p>Full details of the experimental design and statistical methods used should be given in the Methods section, as detailed in our <a href="#">Minimum Standards Reporting Checklist</a>. Information essential to interpreting the data presented should be made available in the figure legends.</p> <p>Have you included all the information requested in your manuscript?</p>                                                                                                                                                   |                       |
| <p>If not, please give reasons for any omissions below.</p> <p>as follow-up to "<b>Experimental design and statistics</b></p> <p>Full details of the experimental design and statistical methods used should be given in the Methods section, as detailed in our <a href="#">Minimum Standards Reporting Checklist</a>. Information essential to interpreting the data presented should be made available in the figure legends.</p> <p>Have you included all the information requested in your manuscript?</p> <p>"</p>            | <p>Review article</p> |
| <p><b>Resources</b></p> <p>A description of all resources used, including antibodies, cell lines, animals and software tools, with enough information to allow them to be uniquely identified, should be included in the Methods section. Authors are strongly encouraged to cite <a href="#">Research Resource Identifiers</a> (RRIDs) for antibodies, model organisms and tools, where possible.</p> <p>Have you included the information requested as detailed in our <a href="#">Minimum Standards Reporting Checklist</a>?</p> | <p>No</p>             |
| <p>If not, please give reasons for any omissions below.</p> <p>as follow-up to "<b>Resources</b></p> <p>A description of all resources used, including antibodies, cell lines, animals</p>                                                                                                                                                                                                                                                                                                                                          | <p>Review article</p> |

|                                                                                                                                                                                                                                                                                                                                                                                                                                                                                                                                                                                                                                               |                       |
|-----------------------------------------------------------------------------------------------------------------------------------------------------------------------------------------------------------------------------------------------------------------------------------------------------------------------------------------------------------------------------------------------------------------------------------------------------------------------------------------------------------------------------------------------------------------------------------------------------------------------------------------------|-----------------------|
| <p>and software tools, with enough information to allow them to be uniquely identified, should be included in the Methods section. Authors are strongly encouraged to cite <a href="#">Research Resource Identifiers</a> (RRIDs) for antibodies, model organisms and tools, where possible.</p> <p>Have you included the information requested as detailed in our <a href="#">Minimum Standards Reporting Checklist</a>?</p> <p>"</p>                                                                                                                                                                                                         |                       |
| <p><b>Availability of data and materials</b></p> <p>All datasets and code on which the conclusions of the paper rely must be either included in your submission or deposited in <a href="#">publicly available repositories</a> (where available and ethically appropriate), referencing such data using a unique identifier in the references and in the "Availability of Data and Materials" section of your manuscript.</p> <p>Have you have met the above requirement as detailed in our <a href="#">Minimum Standards Reporting Checklist</a>?</p>                                                                                       | <p>No</p>             |
| <p>If not, please give reasons for any omissions below.</p> <p>as follow-up to "<b>Availability of data and materials</b></p> <p>All datasets and code on which the conclusions of the paper rely must be either included in your submission or deposited in <a href="#">publicly available repositories</a> (where available and ethically appropriate), referencing such data using a unique identifier in the references and in the "Availability of Data and Materials" section of your manuscript.</p> <p>Have you have met the above requirement as detailed in our <a href="#">Minimum Standards Reporting Checklist</a>?</p> <p>"</p> | <p>Review article</p> |

1  
2  
3  
4  
5  
6  
7  
8  
9  
10  
11  
12  
13  
14  
15  
16  
17  
18  
19  
20  
21  
22  
23  
24  
25  
26  
27  
28  
29  
30  
31  
32  
33  
34  
35  
36  
37  
38  
39  
40  
41  
42  
43  
44  
45  
46  
47  
48  
49  
50  
51  
52  
53  
54  
55  
56  
57  
58  
59  
60  
61  
62  
63  
64  
65

1 Review:

## 3 **From chromatogram to analyte to metabolite. How to pick horses** 4 **for courses from the massive web-resources for mass spectral plant** 5 **metabolomics**

6 Leonardo Perez de Souza<sup>1\*</sup>, Thomas Naake<sup>1</sup>, Takayuki Tohge<sup>1</sup> and Alisdair R. Fernie<sup>1\*</sup>

7 <sup>1</sup> Max-Planck-Institute of Molecular Plant Physiology, Am Mühlenberg 1, 14476 Potsdam-  
8 Golm, Germany

9 \* Correspondence: [LPerez@mpimp-golm.mpg.de](mailto:LPerez@mpimp-golm.mpg.de); [fernie@mpimp-golm.mpg.de](mailto:fernie@mpimp-golm.mpg.de)

Field Code Changed

### 10 **Abstract**

11 The grand challenge currently facing metabolomics is the expansion of the coverage of the  
12 metabolome from a minor percentage of the metabolic complement of the cell towards the  
13 level of coverage afforded by other post-genomic technologies such as transcriptomics and  
14 proteomics. In plants this problem is exacerbated by the sheer diversity of chemicals that  
15 constitute the metabolome with the number of metabolites in the plant kingdom generally  
16 being considered to be in excess of 200 000. In this review we focus on web-resources that  
17 can be exploited in order to improve analyte and ultimately metabolite identification and  
18 quantification. There is a wide range of available software that not only aids in this but also  
19 in the related area of peak alignment, however, for the uninitiated choosing which program  
20 to use is a daunting task. For this reason we provide an overview of the pros and cons of the  
21 software as well as comments regarding the level of programming skills required to effectively  
22 exploit their basic functions. In addition the torrent of available genome and transcriptome  
23 sequences that followed the advent of next-generation sequencing has opened up further  
24 valuable resources for metabolite identification. All things considered, we posit that only via  
25 a continued communal sharing of information such as that deposited in the databases  
26 described within the article are we likely to be able to make significant headway towards  
27 improving our coverage of the plant metabolome.

28 **Keywords:** Arabidopsis, bioinformatics, crop species, GC-MS, LC-MS, peak identification,  
29 peak annotation.

## Background

Metabolomics emerged in the late 1990s with the term coined in a review of Steven Oliver [1]. However, the 2000 paper by Fiehn and co-workers wherein gas chromatography (GC) coupled to mass spectrometry (MS) defined the chemical composition of a morphological and metabolic mutant of the model plant *Arabidopsis thaliana* [2]; in doing so they were able to describe changes in the level of 326 analytes. This work thus greatly extended on the early metabolite profiling study of Sauter et al. [3], which presented the technology as a means of putative classification of mode-of-action of pesticides. Thus the advent of metabolomics in plants arguably preceded that in microbes and mammals although the approach was rapidly adopted in these communities also [2, 4-6]. During the next two decades metabolomics had one considerable advantage over profiling technologies such as transcriptomics and proteomics in that it is not directly reliant on the genome sequence and during this time the species scope of metabolomics rapidly expanded such that it was no longer merely a tool for identifying biomarkers of cellular circumstance but additionally one of the cornerstones of systems biology and an approach which could provide mechanistic insight into metabolic regulation [7-11]. This advantage has subsequently disappeared following the widespread adoption of next-generation sequencing and the lack of linear relationship between the genome and the metabolome now represents part of the problem in identification of unknown analytes [12]. This is nicely exemplified by the fact that computation of the size of the metabolome on genome information as attempted by Nobeli and co-workers in 2003 for the *E. coli* metabolome and [13] rendered values far smaller than the number of metabolites actually measured to date [14]. Whilst the size of the metabolome for prokaryotes has been estimated at a couple of thousand, that of the plant kingdom dwarves these numbers with estimates ranging between 200 000 and 1 million metabolites [15]. Within the last two decades metabolomics has been employed to address a wide range of important questions in plant biology including pathway structure [15], the influence of metabolism on growth [8, 16], plant ecology [17], various aspects of plant genetics including evolution and the domestication syndrome [18-20] as well as detailed characterizations of the metabolic response to biotic and abiotic stressors [21, 22].

In this review, we discuss two topics. The first is the availability of tools to aid in chromatogram evaluation. Since we last reviewed this in 2009 [23], the number of resources has exploded as has their diversity in type. In 2009 a number of pathway, analytical standards, analytical samples and literature databases were available. In the intervening period additional sites providing information on experimental and *in silico* mass fragmentation, isotopic labeling, pathway predicted metabolites, integration of metabolomics with other platforms and mass spectrometry imaging have become available. For each resource we will briefly outline functionality and provide illustrative examples of their utility. The second is to review the current status of the broad variety of plant metabolomics databases. In this respect we list sources of archived data and their respective volumes of data. We also briefly discuss recent meta-analysis which illustrate

Field Code Changed

Field Code Changed

Commented [LPdS1]: Reviewer #2:  
138: add full stop or semicolon after Arabidopsis Thaliana

Field Code Changed

Formatted: English (United States)

Field Code Changed

1  
2  
3  
4  
5  
6  
7 74 that despite current hurdles regarding comparability of data there is great potential for  
8 75 cross-study comparisons on metabolite responses in determining common responses  
9 76 between either genetic or environmental perturbations of metabolism. Finally, we will  
10 77 provide an outlook as to how the grand challenge of comprehensivity will best be met and  
11 78 how the power of archived plant metabolic responses will be best exploited in the future.

12 79 It is not the scope of this review to discuss the theoretical details of every procedure or to  
13 80 document the subtle differences between the many similar tools referred to here. We  
14 81 rather aim to provide a general idea of the importance and challenges of each step in the  
15 82 metabolomics workflow and to summarize the major functions of each tool while referring  
16 83 to the more comprehensive literature supporting them. We attempt to classify all the  
17 84 resources in a simple and logical manner in order to facilitate understanding of the main  
18 85 functionalities of each one. It is, however, important to mention that while few of the tools  
19 86 presented here provide a complete workflow, most of them are able to perform multiple  
20 87 complementary functions somewhat blurring any initiative to accord their functions specific  
21 88 classifications. Other important information that we include here is how these tools can be  
22 89 accessed. This is usually performed either via command-line-or graphical-user-interface  
23 90 (GUI), the former provides flexibility and facilitating integration, automation and  
24 91 development, while the latter was developed to be intuitive and friendly for unexperienced  
25 92 users. Finally, it is important to highlight that the active developments in the field result in  
26 93 frequently outdated and discontinued resources. While many groups keep releasing new  
27 94 upgraded versions of their tools, it is often the case that the projects are just discontinued  
28 95 and the tools are kept available online. We tried to represent this by including the most  
29 96 recent references as well as the last update dates for each of the resources in  
30 97 supplementary table 1. All these features considered allow the researcher to access the  
31 98 information required to choose the “winning horse” under the conditions or “course” in  
32 99 which they are racing. Finally it is also important to highlight that these tools are constantly  
33 100 being updated, integrated and discontinued, and while we ensured that all the links  
34 101 provided here were functioning at the time of writing, it is impossible to ensure that to be  
35 102 the case in the future.

#### 41 103 **Sample preparation and data acquisition**

42  
43 104 The metabolomics workflow (Figure 1) starts with sample preparation including extraction  
44 105 and often coupled to pre-treatment and chemical derivatization, followed by data  
45 106 acquisition which will depend on the chromatographic system, ionization source and  
46 107 analyzer. Optimization of sample preparation and data acquisition can considerably improve  
47 108 the analysis and is particularly interesting for plant metabolomics where matrix complexity  
48 109 is very high; nevertheless this step is often skipped over in favor of standardization and  
49 110 simplicity which allow for greater sample throughput. Methods for chromatography mass  
50 111 spectrometry based optimization are well developed and usually rely on statistical designs  
51 112 collectively known as Design of Experiments (DoE) [24].

**Commented [LPdS2]:** Reviewer #2:  
I 78: change to: plant metabolic responses will be best exploited in the future

Field Code Changed

Field Code Changed



1  
2  
3  
4  
5  
6  
7  
8  
9  
10  
11  
12  
13  
14  
15  
16  
17  
18  
19  
20  
21  
22  
23  
24  
25  
26  
27  
28  
29  
30  
31  
32  
33  
34  
35  
36  
37  
38  
39  
40  
41  
42  
43  
44  
45  
46  
47  
48  
49  
50  
51  
52  
53  
54  
55  
56  
57  
58  
59  
60  
61  
62  
63  
64  
65

While some studies have detailed its application in plant metabolite extraction [25] and liquid chromatography (LC) analysis [26], very few software tools were developed so far focusing on this kind of approach for metabolomics data. That said a couple of interesting software are MUSCLE [27], a tool for the automated optimization of targeted LC-MS/MS analysis that was shown to significantly shorten analysis times and increase analytical sensitivities of targeted metabolite analysis, and FragPred [28], which uses experimental fragmentation from a database to select common fragmentation products that minimize uncertainty about metabolite identities in large-scale MRM experiments, have been published and appear to be highly promising.

### Data processing

Raw mass spectrometry chromatograms are three dimensional data consisting of a distribution of m/z intensities over the time. Processing this data requires filtering, detecting and integrating relevant features, aligning signals across different samples, extracting compound mass spectra and normalizing the data, all with the final goal of simplifying and hence facilitating data interpretation.

Feature detection and peak alignment are the initial steps for extracting information from raw data and corresponds to the process in which relevant signals are identified and quantified across samples, having peak alignment as one of the big challenges to overcome, particularly for LC-MS where retention time is more prone to fluctuations in relation to GC-MS. The many different approaches available to perform these steps of data processing were recently reviewed by [29, 30], and some of the most popular algorithms for feature detection and peak alignment were compared in different works [31, 32]. Most software somehow integrate both steps in the same pipeline to generate a report of signal intensities over samples from raw data, and many of them also include some resource for data analysis and peak annotation that will be discussed later in more detail. In the following section we will detail the available tools for this step, adopting a similar approach in all subsequent sections also (the details of the programs are all given in additional file 1). MetAlign [33] is a versatile tool that performs well with both LC-MS and GC-MS and allows direct conversion from and to vendor formats while most other tools need an extra software for this step. It additionally provides a series of functionalities through other tools that are developed by the same group and integrate directly in the output of MetAlign. XCMS appears to be the most cited software for LC-MS data processing, it was developed for R and implements different algorithms for feature detection and alignment suitable for different kinds of data, while it can be argued that the software requires familiarity with programming and lacks resources for simple data inspection, its platform is, nevertheless, powerful and easily integrated with other tools and its extensive community of users provide a great resource for troubleshooting. Moreover, a great number of other tools are built upon the functions of XCMS [34]. Amongst these, TracMass 2 [35], a MATLAB software which provides a GUI in a

- Field Code Changed

- Field Code Changed
- Field Code Changed
- Field Code Changed
- Field Code Changed

- Field Code Changed
- Field Code Changed

- Field Code Changed
- Field Code Changed
- Field Code Changed
- Field Code Changed





1  
2  
3  
4  
5  
6  
7  
8  
9  
10  
11  
12  
13  
14  
15  
16  
17  
18  
19  
20  
21  
22  
23  
24  
25  
26  
27  
28  
29  
30  
31  
32  
33  
34  
35  
36  
37  
38  
39  
40  
41  
42  
43  
44  
45  
46  
47  
48  
49  
50  
51  
52  
53  
54  
55  
56  
57  
58  
59  
60  
61  
62  
63  
64  
65

spectra instead of individual peaks to align signals across samples, which is expected to improve peak information for downstream analyses, it also match spectrum against an user-specific library. TNO-DECO [57] uses a segmentation approach to allow the performance of simultaneous deconvolution of multiple chromatographic MS files in a semi-automated fashion in MATLAB, thereby eliminating peak alignment. By contrast, MetaMS [58] is a pipeline for high-throughput GC-MS processing based on XCMS for peak detection and alignment and CAMERA for compound spectra extraction. ~~Compound spectra which is further~~ annotated based on match with a database, ~~this~~ This tool may be convenient for users that already implement XCMS analysis of other data, but this kind of processing is not optimal for GC-MS when compared with other processing types. Maui-VIA [59] implements a graphical interface that facilitates visual inspection of identifications and alignments providing faster interaction with the data. eRah [60] is an R tool that integrates a novel spectral deconvolution method using multivariate techniques based on blind source separation, alignment of spectra across samples without the need of internal standards for calculating retention indexes, quantification, and automated identification of metabolites by spectral library matching, in a fully automated pipeline, even though internal standards are not necessary they are still recommended to increase reliability in metabolite identification. The software ADAP-GC 3.0 [61] uses a deconvolution algorithm based on hierarchical clustering of fragment ions, the updated version is incorporated into the MZmine 2 platform and addressed issues from the first version such as fragment ions that are produced by more than one co-eluting components, and improved sensitivity and robustness. Finally, MetPP [62] is a processing tool that includes normalization and statistical analysis but is directed towards data emanating from GCxGC-TOF MS system.

Extracting compound mass spectra is another important step of data processing that reduces data complexity by many orders of magnitude by identifying m/z signals that belong to the same compound and provide essential information for further metabolite annotation through the reconstructing of mass spectra. While this process is usually integrated in GC-MS tools for feature detection, alignment and annotation, as mentioned above, there are many approaches to deal with LC-MS data such as the ones employed by CAMERA [63] a package developed in R to extract compound spectra, annotate isotopes and adducts, and propose compound mass as an extension to XCMS, it is easy to use in combination with this software and provides a significant reduction on data complexity. AStream [64] is another R package very similar to CAMERA but using a simpler algorithm for grouping the peaks. ALlocator [65], is a web based workflow that applies centwave from XCMS for feature detection followed by spectra deconvolution either by CAMERA or by the ALlocatorSD algorithm which is optimized for dealing with the particularities of <sup>13</sup>C labeled data by grouping mirrored isotopes (lighter isotopologues from feeding experiment). MSclust [66], has the same general features as the others but it was developed in the C++ language and it is optimized to work with the output files of MetAlign. RAMclustR [67] was developed in MATLAB and implemented in R, accepting directly the output of XCMS. The authors suggest

Field Code Changed

Field Code Changed

Commented [LPdS3]: Reviewer #2:  
I 231 to 236: Break down this sentence in two. Too long to follow properly.

Field Code Changed

1  
2  
3  
4  
5  
6  
7  
8  
9  
10  
11  
12  
13  
14  
15  
16  
17  
18  
19  
20  
21  
22  
23  
24  
25  
26  
27  
28  
29  
30  
31  
32  
33  
34  
35  
36  
37  
38  
39  
40  
41  
42  
43  
44  
45  
46  
47  
48  
49  
50  
51  
52  
53  
54  
55  
56  
57  
58  
59  
60  
61  
62  
63  
64  
65

the use of a workflow consisting of data acquisition under both low and high collision energy as a way to improve the quality of the spectra generated by feature clustering and provide a data format that can be submitted directly to the MassBank Database and NIST MSSearch program. By contrast, RAMSY [68] uses average peak ratios and their standard deviations rather than correlation to allow the recovery of compound spectra, the performance of this approach is typically better than the results from correlation methods, furthermore, the script for MATLAB is available or it can be run from a web interface with a .csv table as input.

The last step of data processing, data normalization, is essential for further data analysis in order to remove bias introduced by sample preparation from meaningful biological variation. Most methodologies rely either on the use of internal standards statistical means for normalization. Most data normalization procedures are usually integrated in data analysis tools, but there are few examples of more specialized tools such as MetTailor [69] that uses a dynamic block summarization method for correcting misalignments reducing missing data and apply an RT-based local normalization procedure, or Normalizer [70] that uses twelve different well known normalization methods and compares the results based on different parameters. IntCor [71] that corrects for peak intensity drift effects based on variance analysis, MetNormalizer [72] which allows normalization and integration of multiple batches in large scale experiments using support vector regression, and EigenMS [73] which detect bias trends in the data and eliminates them using single value decomposition are also highly useful. All of these software are implemented in R, however, with the exception of Normalizer which can be also used in a web interface they all require considerable familiarity with this programming language. A couple of other tools that help to extract specific information previous to data analysis include the program SpectConnect [74], that identifies conserved metabolites in GC-MS datasets, and MathDAMP [75], a Mathematica package for Differential Analysis of Metabolite Profiles highlighting differences within raw LC-MS and GC-MS datasets.

A common feature of mass spectrometry data is the presence of multiple peaks for individual fragments resulting from the distribution of natural isotopes which are particularly interesting and explored in stable isotope labeling experiments. There are a few tools for correcting and extracting label enrichment from processed data such as Corrector [76], IsoCor [77] and ICT [78]. These tools are very similar -all being based on the same matrix calculation. Corrector was developed to work on the output of TagFinder but data processed with most other tools can be easily arranged in a similar table format. IsoCor provides a GUI with a few different options including corrections for the label input whereas ICT includes features to process data from tandem MS. Nevertheless most data processing pipelines available are not particularly efficient for dealing with this kind of experiment, to fill this gap there are some specialized tools like mzMatch-ISO [79], integrated in the mzMatch pipeline. This software -is capable of targeted and untargeted processing of labeled datasets and the output includes a set of plots summarizing the pattern of labelling

Field Code Changed

Formatted: English (United States)

Field Code Changed

Formatted: English (United States)

Commented [LPd54]: . Please transfer mathdamp and spectconnect to data processing section.  
Reply: Done

Formatted: Not Highlight

Formatted: Not Highlight

Field Code Changed

Field Code Changed

Formatted: Not Highlight

Field Code Changed

1  
2  
3  
4  
5  
6  
7  
8  
9  
10  
11  
12  
13  
14  
15  
16  
17  
18  
19  
20  
21  
22  
23  
24  
25  
26  
27  
28  
29  
30  
31  
32  
33  
34  
35  
36  
37  
38  
39  
40  
41  
42  
43  
44  
45  
46  
47  
48  
49  
50  
51  
52  
53  
54  
55  
56  
57  
58  
59  
60  
61  
62  
63  
64  
65

observed per peak allowing users to quickly explore data. MetExtract [80] which relies on a mixture of cultures from the same organism under natural and labeled media to select signals that show a clear pattern of isotopic enrichment. However, the approach requires the labeled fraction to be fully labeled and the tracer to be highly pure to get the proper isotopic distributions. X13CMS [81] and geoRge [82], both run on the R platform using GC-MS output, the former algorithm ~~iterating iterates~~ over MS signals in each mass spectra using the mass difference due to the label, while the latter uses statistical testing to distinguish Spectral peaks originated from labeled metabolites resulting in significant less false positives. The MIA program [83] detects isotopic enrichment in GC-MS datasets in a non-targeted manner, providing an easy GUI to visualize mass isotopomer distributions (MID) of the detected fragments as barplots including confidence intervals and quality measures, tools for differential analysis of relative mass isotopomer abundance across samples and network assembly based on pairwise similarity of MID that can reveal related metabolites.

Another important feature of many mass spectrometry systems is their capability of performing tandem mass spectrometry. While this can significantly improve data in many ways, it adds another level of complexity for data processing. A very common use of tandem MS is to increase selectivity and accuracy in targeted analysis and MRManalyzer [84], MMSAT [85] and MRMPROBS [86] are useful tools developed for processing data from multiple reaction monitoring experiments. MMSAT [85] is a web tool that takes mzXML files as the input, it is able to automatically quantify MRM peaks but lacks metabolite identification capability. By contrast, MRMPROBS [86] detects and identifies metabolites automatically, providing a user-friendly GUI for data analysis. The algorithm has one limitation that it needs at least two transitions per metabolite in order to discriminate the target metabolite from isomeric metabolites and the background noise. Similarly, MRManalyzer [84] is an R tool allowing processing, alignment, metabolite identification, quality control check and statistical analysis of large datasets that transforms data in "pseudo" accurate m/z, in order to use the centwave algorithm from XCMS for peak detection. Untargeted metabolomics analysis can also take advantage of tandem MS, particularly for compound annotation, and there are few resources for dealing with the complexity of such experiments such as decoMS2 [87], an R package for deconvoluting MS2 spectra eliminating contaminating fragments without the need of sacrificing sensitivity in favor of sensibility by narrowing the window of isolation for collision-induced dissociation (CID) during data acquisition. This approach requires MS2 data to be acquired under low and high collision energies to solve the mathematical equations potentially reducing sensitivity of the method. Similarly, MS2Analyzer is a java software for identifying neutral losses, precursor ions, product ions and m/z differences from MS2 spectra based on a list of predefined transitions. These features are essential for structure elucidation using mass spectrometry and the software provides a fast and high throughput platform for extracting this data. MS2LDA is based on latent Dirichlet allocation (LDA), an algorithm originally used

Field Code Changed

Commented [LPd55]: Reviewer #2:  
1308: iterates instead of iterating

Field Code Changed

Formatted: Highlight

Formatted: Highlight

Formatted: Highlight

1  
2  
3  
4  
5  
6  
7  
8  
9  
10  
11  
12  
13  
14  
15  
16  
17  
18  
19  
20  
21  
22  
23  
24  
25  
26  
27  
28  
29  
30  
31  
32  
33  
34  
35  
36  
37  
38  
39  
40  
41  
42  
43  
44  
45  
46  
47  
48  
49  
50  
51  
52  
53  
54  
55  
56  
57  
58  
59  
60  
61  
62  
63  
64  
65

for text mining that was adapted to generate a list with blocks of co-occurring fragments and losses providing results similar to MS2Analyzer but without the need of user specified precursor/product transitions.

MS-DIAL [88] and MetDIA [89] both deal with Data-independent acquisition (DIA) data, an interesting approach for untargeted metabolomics that acquire MS2 spectra for all precursor ions simultaneously with the complication that it uses larger isolation windows, hence increasing the probability of contamination in the MS2, and it loses the relation between precursor and fragment ions. MS-DIAL addresses these problems by a mathematical deconvolution based on GC-MS processing tools in a fully untargeted manner, whilst achieving the metabolite identification through a spectrum-centric library matching. MS-DIAL is applicable to both data-independent and data-dependent MS/MS fragmentation methods in LC-MS and GC-MS. By contrast, MetDIA [89] uses algorithms from XCMS for peak detection and alignment combined with a targeted approach based on matching metabolites in a library to the detected peaks, thus achieving higher sensitivity and specificity on metabolite identification and wider metabolite coverage.

A trade-off for most of the more flexible and powerful resources presented here is that they have multiple parameters that need to be optimized, and recently a number of tools try to assist in evaluating and automatizing this process. In this context IPO [90] was developed to perform automatic optimization of XCMS parameters based on design of experiment, Credentialing Features [91] optimize detection based on regular and 13C-enriched, MetaboQC [92] is a quality control approach that evaluates alignment and suggests optimal parameters for feature detection based on discrepancies between replicate samples, and SIMAT [93] allows the selection of the optimal set of fragments and retention time windows for target analytes in GC-SIM-MS based analysis.

### Data analysis

Metabolomics datasets are usually characterized by high dimensionality, heteroscedasticity (i.e. the variance in errors is not constant across the dataset) and differences of orders of magnitude across metabolite concentrations and fold changes, making it challenging to extract and visualize useful information from processed data. There are numerous approaches for data scaling, reduction, visualization and statistical analysis particularly useful for analyzing metabolomics data, many of them very well established such as analysis of variance (ANOVA), hierarchical cluster analysis (HCS), principal component analysis (PCA) and partial least squares discriminant analysis (PLS-DA) to mention just a few. There are many general statistical software capable of performing most of these functions, but also a variety of software tools exist combining procedures relevant to metabolomics in a single pipeline and thus facilitating the workflow such as DeviumWeb (<https://github.com/dgrapov/DeviumWeb>), BioStatFlow (<http://biostatflow.org/>), MetaboLyzr [94], metaP-Server [95], Fusion (<https://fusion.cebitec.uni->

Field Code Changed  
Field Code Changed

Commented [LPdS6]: I think MS-DIAL is not only for DIA-MS, but also all other techniques such as GC/MS and DDA.  
Field Code Changed

Field Code Changed  
Field Code Changed  
Field Code Changed  
Field Code Changed  
Field Code Changed  
Field Code Changed

Field Code Changed  
Field Code Changed  
Field Code Changed  
Field Code Changed  
Field Code Changed  
Field Code Changed





1  
2  
3  
4  
5  
6  
7  
8  
9  
10  
11  
12  
13  
14  
15  
16  
17  
18  
19  
20  
21  
22  
23  
24  
25  
26  
27  
28  
29  
30  
31  
32  
33  
34  
35  
36  
37  
38  
39  
40  
41  
42  
43  
44  
45  
46  
47  
48  
49  
50  
51  
52  
53  
54  
55  
56  
57  
58  
59  
60  
61  
62  
63  
64  
65

DataBase (HMDB), Madison Metabolomics Consortium Database (MMCD), Metlin, and LipidMaps. Similarly, PUTMEDID-LCMS [112] developed in the Taverna Workflow Management System, also integrates a step of compound mass spectra extraction to define a molecular formula from high resolution m/z that is then matched against a predefined list of molecular formulas to annotate compounds. MetAssign [113] is integrated in mzMatch and it considers the uncertainty related with metabolite annotation using a Bayesian clustering approach to assign peak groups, this approach has the advantage of providing a quantitative values for uncertainty/confidence in the outputs that can be used in further analysis. The program SIRIUS [114] is a Java-based software that combines high accuracy mass with isotopic pattern analysis to distinguish even molecular formulas in higher mass regions. Furthermore it also analyses the fragmentation pattern of a compound using fragmentation trees that can be directly uploaded to CSI:FingerID (described below) via a web service. MFSearcher [115] is a tool that efficiently searches high accuracy masses against a database of pre-calculated molecular formulas with fixed kinds and numbers of atoms that are further queried against different databases, HR3 [116] is a similar tool for molecular formula calculation and query in external databases. It uses different sets of rules for heuristic filtering of candidate formulas instead of a pre-calculated database which makes it slightly slower than MFSearcher, but HR3 includes compounds with atoms that are not present in MFSeacher's list as well as considering matches to the isotopic pattern within its annotations. MS-FINDER [117] is a C# program with a GUI providing a constraint-based filtering method for selecting structure candidates. The workflow begins with molecular formulas from precursor ions being determined from accurate mass, isotope ratio, and product ion information. Next, structures of predicted formulas are retrieved from databases, MS/MS fragmentations are predicted and the structures are ranked considering bond dissociation energies, mass accuracies, fragment linkages, and, most importantly, nine hydrogen dissociation rules. MS-FINDER provides an interesting theoretical background from which to interpret MS/MS spectra and its comparison to database matches. Additionally it was shown to be able to predict with 91.8% accuracy over 80% of the manually annotated metabolites in test samples [117]. MS2Analyzer [118] is a java software for identifying neutral losses, precursor ions, product ions and m/z differences from MS2 spectra based on a list of predefined transitions. These features are essential for structure elucidation using mass spectrometry and the software provides a fast and high-throughput platform for extracting this data. MS2LDA [119] is based on latent Dirichlet allocation (LDA), an algorithm originally used for text mining that was adapted to generate a list with blocks of co-occurring fragments and losses providing results similar to MS2Analyzer but without the need of user specified precursor/product transitions.

Another level of biologically relevant information is added by many tools that incorporate pathway information to assist annotation and interpretation of results such as Metabolome searcher [120], a web-based application to directly search genome-constructed metabolic databases which includes MetaCyc with data on plant metabolism. MassTRIX [121] is a web

Field Code Changed

**Commented [LPd58]:** In metabolite annotation section, cite CASMI, and see MS-FINDER and CSI-IOKR are also interesting tools which have been recently developed.  
Reply: Done  
**Formatted:** English (United States)  
**Field Code Changed**  
**Formatted:** English (United States)

**Commented [LPd59]:** Please transfer ms2lda and ms2analyzer to 'annotation' section.  
Reply: Done  
**Field Code Changed**  
**Formatted:** Not Highlight  
**Formatted:** Not Highlight  
**Formatted:** Not Highlight  
**Formatted:** Not Highlight  
**Formatted:** Not Highlight

Field Code Changed

Field Code Changed

1  
2  
3  
4  
5  
6  
7  
8  
9  
10  
11  
12  
13  
14  
15  
16  
17  
18  
19  
20  
21  
22  
23  
24  
25  
26  
27  
28  
29  
30  
31  
32  
33  
34  
35  
36  
37  
38  
39  
40  
41  
42  
43  
44  
45  
46  
47  
48  
49  
50  
51  
52  
53  
54  
55  
56  
57  
58  
59  
60  
61  
62  
63  
64  
65

interface that takes a mass peak list from HRMS as input and matches them against KEGG compounds database returning a pathway map with the matches, organisms can be selected and the output represents organism-specific and extra-organism items differentially colored to assist interpretation. MetabNet [122] is an R package to perform targeted metabolome wide association study of specific metabolites. This approach uses the correlation of all mass signals with the targeted metabolite across samples to build networks that can be visualized in pdf or exported to Cytoscape. This can be a very useful approach to identify related compounds and associate them to metabolic pathways. Similarly, ProbMetab [123] is an R package for probabilistic annotation of compounds based on the method developed by Rogers et al. (2009) [124] that incorporates information on possible biochemical reactions between the candidate structures to assign higher probabilities to compounds that form substrate/product pairs within the same sample. MIPack [125], implemented in python, calculates differences in mass between all molecular formulas annotated from HRMS and compares them to known substrate/product pairs from KEGG, but matches are considered based on the error between experimental and theoretical masses compared to a threshold defined by a calculated mass error surface. PlantMAT [126] is a particularly interesting tool specifically for the investigation of plant specialized metabolism, which uses an approach based on common metabolic building blocks to predict combinatorial possibilities of phytochemical structures used for annotation and as such is a highly effective way to search the chemical space surrounding a (set of) metabolite(s)

Another more recent and promising approach made possible by the huge amount of data available uses algorithms, mostly based on machine learning, to predict molecular properties of unknown compounds from its tandem mass spectra. All the tools listed below provide similar web interfaces for putative metabolite identification differing mainly on the algorithms used to perform the identification and the overall performance. MetFrag [127] retrieves candidate structures either from databases based on exact mass or from user specified structure-data files (SDF), a data format based on MDL Molfile with focus on caring structural information files. Candidate structures are fragmented using a bond dissociation approach and fragments are compared with the input spectra scoring matches based on a series of rules. The candidates can also be filtered to facilitate the analysis based on relevant factors such as metabolite origin, composition, LC retention time and metadata from the databases. Besides the Java web-interface a command line version and an R package are provided which are more suitable for batch processing and integration with other tools. In a very similar approach MolFind [128] retrieves candidates from databases based on exact mass, filters them by comparing experimentally measured retention index, ECOM50 (the energy in eV required to fragment 50% of a selected precursor ion) and drift time (for ion mobility MS) with predicted ones, and analysis CID of the best candidates using MetFrag. CFM-ID [129] is based on competitive fragmentation modeling, a probabilistic generative model that uses machine learning to

Field Code Changed

Commented [LPdS10]: Reviewer #2:  
I 440: full stop after metabolites

Field Code Changed

Commented [LPdS11]: Reviewer #2:  
I 463: describe SDF files

Field Code Changed

Field Code Changed

Field Code Changed

Field Code Changed





1  
2  
3  
4  
5  
6  
7  
8  
9  
10  
11  
12  
13  
14  
15  
16  
17  
18  
19  
20  
21  
22  
23  
24  
25  
26  
27  
28  
29  
30  
31  
32  
33  
34  
35  
36  
37  
38  
39  
40  
41  
42  
43  
44  
45  
46  
47  
48  
49  
50  
51  
52  
53  
54  
55  
56  
57  
58  
59  
60  
61  
62  
63  
64  
65

information of more than 50,000 metabolites, and chemical composition of over 22,000 species, the [Universal Natural Products Database \(UNPD\)](#) [167], [with 229358 metabolite structures](#) [Flavonoid viewer](#) [168] with 6,902 molecular structures of flavonoids from 1,687 plant species, Dr. Duke's Phytochemical and Ethnobotanical Databases (<https://phytochem.nal.usda.gov/phytochem/search>) with information on 29,585 chemicals of 3,686 medicinal plants, [BioPhytMol](#) [169] a resource on anti-mycobacterial phytomolecules and plant extracts holding 2,582 entries including 188 plant families, comprised of 692 genera and 808 species, and 633 active compounds and plant extracts identified against 25 target mycobacteria, and [EssOilDB](#) [170], with 123,041 essential oil records from 92 plant families. These are very interesting resources for screening chemical composition of specific species and analyzing chemical distribution species wide, and all of the data in these databases is manually curated. From all this resources KNApSack is particularly useful not only for the large amount of data but also for providing an easy platform to access and extract information quickly.

Databases providing mass spectra of pure compounds under controlled conditions developed to allow search for common spectra features for the identification of unknown compounds are an essential resource for MS based identification of metabolites. As previously mentioned the great stability and reproducibility of GC-MS generates reliable fragmentation patterns and relative retention indexes that are very efficient for metabolite annotation by spectra matching. NIST is a very popular commercial library for GC-MS annotation, that also provide free access to some data ~~through~~ NIST Chem WebBook (<http://webbook.nist.gov/chemistry/>), containing mass spectra of 33,000 compounds. SDBS ([http://sdbs.db.aist.go.jp/sdbs/cgi-bin/cre\\_index.cgi](http://sdbs.db.aist.go.jp/sdbs/cgi-bin/cre_index.cgi)) with 25,000 mass spectra is the database from the National Institute of Advanced Industrial Science and Technology (AIST) from Japan. Both of them are limited in the fact that they do not offer an interface for spectra matching and the user have limited access to data, so those are only useful for checking the spectra of targeted compounds. Some more interesting freely-accessible plant specific GC-MS libraries include the Golm metabolome database [171] with a total of 26,590 spectra and 4,663 analytes at the time this article was written and the VocBinBase [172] includes 1,537 unique mass spectra at the time this article was written. Both of these databases can be downloaded and integrated to processing tools for metabolite annotation based on spectra matching. [Also worth mentioning is fiehnLib](http://fiehnlab.ucdavis.edu/projects/fiehnlib) (<http://fiehnlab.ucdavis.edu/projects/fiehnlib>), however, [access of the spectral data is highly limited for this resource.](#)

One of the greatest efforts in the field of metabolomics has been directed to the development of databases of mass spectra obtained from LC-MS analysis. The higher flexibility of this technique compared to GC-MS in terms of the chemical space that it can analyze comes with the drawback of a high sensitivity to multiple factors that can influence mass spectra quality and reproducibility. LC-MS databases are usually characterized by the greatest volume of metadata that accompanies the analytical data, and a more complex

**Commented [LPdS13]:** 6. UNPD database should be cited as natural product database.  
Reply: Done

Field Code Changed

**Commented [LPdS14]:** Reviewer #2: I 575: Also include <http://fiehnlab.ucdavis.edu/projects/fiehnlib>  
Reply: We previously did not include fiehnLib because we could not get access to the spectral data in the library. We have added a comment to that effect here

Field Code Changed

1  
2  
3  
4  
5  
6  
7  
8  
9  
10  
11  
12  
13  
14  
15  
16  
17  
18  
19  
20  
21  
22  
23  
24  
25  
26  
27  
28  
29  
30  
31  
32  
33  
34  
35  
36  
37  
38  
39  
40  
41  
42  
43  
44  
45  
46  
47  
48  
49  
50  
51  
52  
53  
54  
55  
56  
57  
58  
59  
60  
61  
62  
63  
64  
65

structure for search based in spectra features when compared to GC-MS databases. Some large general LC-MS databases include MassBank [173], a public repository of mass spectra with 41,092 spectra of 15,828 compounds obtained by 26 different systems (at the time of writing). This database is very accessible allowing search by submitted spectra or simply by typing in spectral features, mass or targeted compound name, it furthermore allows users to directly extract spectra during data processing through many tools like RAMClustR, RMassBank and Mass++. METLIN [174] currently contains 961,829 molecules from which 200,000 have in silico MS/MS data, ~~and~~ **Additionally over 14,000 metabolites were analyzed** and mass spectra at multiple collision energies in positive and negative ionization mode **obtained**. METLIN also integrates isoMETLIN [175] that allows the search of isotopologues for all METLIN metabolites based on m/z and isotopes of interest, and includes experimental data on hundreds of isotopic labeled metabolites that can be used to obtain information of precursor atoms in the fragments, both databases can be accessed after free registration and searching by mass is fast and easy with the advantage that it allows the user to select possible adducts and spectra conditions and search directly the mass observed in the spectra. T3DB [176], is a database for toxin data, many of which are plant secondary metabolites, with MS, MS-MS and GC-MS spectra of 3,600 common toxic substances (at the time of writing). mzCloud is a new database with a more complex organizing structure that can improve and facilitate data interpretation, currently with 6,255 compounds analyzed in different conditions totalizing 1,913,621 spectra arranged in 9,896 tree structures. It allows the user to easily navigate through different spectra of a single compound through its tree structure and also includes visualization of predicted molecular formula of the fragments in the spectra (<https://www.mzcloud.org/>). Finally the recently developed MoNA (<http://mona.fiehnlab.ucdavis.edu/>) is intended to be a centralized, collaborative database of metabolite mass spectra and metadata, currently containing over 200,000 mass spectral records from experimental and in-silico libraries from different sources. The search is limited to name, compound class, molecular formula or exact mass of the metabolite, it can be filtered by type of spectra, and the results are presented as a single list of individual interactive spectra next to the metadata making it easy to navigate through different spectra. The great diversity of phytochemicals observed in plants represent an important portion of all these numbers, and a few plant specific databases are available such as Spektraris [177], a LC-MS of about 500 plant natural products that integrates accurate mass – time tag to incorporate retention time relative to an internal standard in a similar fashion as it is usually done for GC-MS based annotation, therefore, in order to use this feature it is necessary to analyze samples with addition of the same internal standard used when developing the database entries. It is important to highlight that this kind of approach is much less effective for LC-MS where relative retention time is prone to larger variation. MS-MS Fragment Viewer (<http://webs2.kazusa.or.jp/msmsfragmentviewer/>) is a very small and not very frequently updated database containing FT-MS, IT- and FT-MS/MS spectral data on 116 flavonoids. ReSpect [178] is a collection of MSn spectra data from 9,017 phytochemicals from literature and standards with searching functionalities very similar to MassBank, and

Field Code Changed

Field Code Changed

**Commented [LPdS15]:** You said 'Metline currently contains 961,829 molecules'. Ok my question is: how many records do contain MS/MS information?  
Reply: Included in text: "METLIN currently contains 961,829 molecules from which 200,000 have in silico MS/MS data. Additionally over 14,000 metabolites were analyzed and mass spectra at multiple collision energies in positive and negative ionization mode obtained".

Field Code Changed

1  
2  
3  
4  
5  
6  
7  
8  
9  
10  
11  
12  
13  
14  
15  
16  
17  
18  
19  
20  
21  
22  
23  
24  
25  
26  
27  
28  
29  
30  
31  
32  
33  
34  
35  
36  
37  
38  
39  
40  
41  
42  
43  
44  
45  
46  
47  
48  
49  
50  
51  
52  
53  
54  
55  
56  
57  
58  
59  
60  
61  
62  
63  
64  
65

WEIZMASS [179], a metabolite spectral library of high-resolution MS data from 3,540 plant metabolites that uses a probabilistic approach to match library and experimental data with the MatchWeiz software. WEIZMASS is available for implementation in R as a pipeline for metabolite identification which can be easily integrated with data processing. While this is a much less accessible tool for general use compared with other web based databases the results obtained are far more considerable and the effort required in its use is, therefore, more than compensated by the gains which it affords.

Field Code Changed

A very common issue encountered in data from mass spectrometry is the presence of a variety of contaminants from sample preparation and analysis that can be challenging for data interpretation. MaConDa [180] provides a very useful database of common contaminants and adducts in mass spectrometry, containing over 200 contaminant records with origin of the contaminant, its mass and the adducts formed. MaConDa can be downloaded in different formats or accessed via the web browser.

Field Code Changed

Field Code Changed

Compound spectra databases are essential for identification of metabolites by mass spectrometry, but a significant effort has also been directed towards the development of repositories of experimental data on specific samples to facilitate dereplication studies and data analysis. These databases are often restricted to specific species, as it is the case for AtMetExpress [181], a LC-MS database of Arabidopsis with data on 20 different ecotypes and 36 developmental stages which allows users to download raw and processed data as well as query using mass chromatogram features in the web platform and visualize annotation and distribution of selected features. MeKO [182], is a GC-MS database of 50 Arabidopsis KO mutants. All raw data can be downloaded as netCDF files and results from data analysis can be visualized in a very informative summary in the web browser that shows plant phenotypes, differentially accumulated metabolites indicated in a pathway map and log fold changes for most significantly changed metabolites. MoTo DB [183] is a LC-MS database of *Solanum lycopersicum* with information of annotated metabolites where the user can search for specific masses or a range of masses. The database is based on accurate mass and the user therefore does not have access to raw data and chromatograms. NaDH [184], a platform for integration and visualization of different omics datasets of *Nicotiana attenuata* including LC-MS data on 14 different tissues, allows search for spectra based on name and m/z and provides some interesting tools for data interpretation easily accessible directly from the metabolite entry including metabolite-metabolite and metabolite-gene coexpression analysis and visualization of metabolite expression across different tissues in a bar chart or eFP browser interface. The Optimas-DW software [185], is a data collection for maize data of 15 different experiments, the interface for metabolites allows easy browsing through all the metabolites and visualization of values for individual experiments in a table format but no access to raw data, and the SoyMetDB [186], a metabolomics database for soybean, with GC-MS and LC-MS data of four different tissues under two different conditions, which has a simple interface that provide search by metabolite name or browsing through the whole dataset, metabolite entries provide m/z, retention time as well

Field Code Changed





1  
2  
3  
4  
5  
6  
7  
8  
9  
10  
11  
12  
13  
14  
15  
16  
17  
18  
19  
20  
21  
22  
23  
24  
25  
26  
27  
28  
29  
30  
31  
32  
33  
34  
35  
36  
37  
38  
39  
40  
41  
42  
43  
44  
45  
46  
47  
48  
49  
50  
51  
52  
53  
54  
55  
56  
57  
58  
59  
60  
61  
62  
63  
64  
65

visualization and interpretation. Many of these databases contain either generic pathways or combine different organisms, some examples are KEGG [195], which includes 504 pathway maps with 17,891 compounds and 10,419 reactions for 4,607 different organisms, representing data in an interactive interface that links the entries to a great amount of external resources being one of the most popular sources of information on metabolic pathways One of the greatest issues of KEGG leading many user to misinterpreting their data is that it displays all genes in generic pathway maps of which some are characterized only by similarity, resulting in pathways that are not present in the analysed organism being represented. By contrast, WikiPathways [196], is a wiki-style website with 2,471 community curated pathways of 28 different organisms. Its interactive interface is similar to KEGG providing link with external resources for metabolites and enzymes. Similarly, kpath [197], is a database that integrates information related to metabolic pathways with 74,180 pathways 13,153 reactions and 37,029 metabolites providing tools for pathway visualization, editing and relationship search. BioCyc [198], is a collection of 9,387 Pathway/Genome Databases, and MetaCyc [198] is the largest curated database of experimentally elucidated metabolic pathways containing 2,491 pathways from 2,816 different organisms. KBase [199], meanwhile, is a data platform with data on plants and microbes that allow users to upload their own data and integrates data and tools for systems biology including 1,470 metabolic pathways with 33,773 reactions and 27,838 compounds, genome data on 60 different plant species and tools for assembly, annotation, metabolic modeling, comparative analysis, phylogenetic analysis and expression analysis. There are also a significant amount of plant specific data organized in databases like KaPPA-View4 [145], containing 153 pathways with 1,427 compounds and 1,434 reaction from 10 species, allowing users to upload their own data and is able to represent gene-to-gene and metabolite-to-metabolite relationships as curves on a metabolic pathway maps to help in data interpretation. PlantCyc (<http://www.plantcyc.org/>) provides access to manually curated or reviewed information about metabolic pathways in over 800 pathways of 350 plant species, usefully the platform provides “evidence codes” to clearly indicate the type of support associated with each database item. MetaCrop [200], is a pathway database containing information about seven major crop plants and two model plants that allows integration of experimental data into metabolic pathways, as well as the automatic export of information for the creation of detailed metabolic models. Similarly, MetNetDB [201], contains integrative information on metabolic and regulatory networks of Arabidopsis and Soybean with metabolism, signalling, and transcriptional pathways being fully integrated into a single network and manually curated subcellular localization is represented in the pathway maps. The network information can be exported to other applications for network analysis such as exploRase, and Cytoscape/FCM. Like MetNetDB, Gramene [202] is an integrated data resource for comparative functional genomics in crops and model plants that host pathway databases for rice, maize, Brachypodium~~Bracypodium~~, and sorghum as well as providing mirrors for MetaCyc and PlantCyc data. It is worth mentioning a few resources that are focused on the reactions within the pathways offering detailed curated metabolic reactions, namely

Field Code Changed

**Commented [LPdS16]:** Reviewer #2:  
I 731: PlantCyc only has 22 species.  
Reply: The plant metabolic network (PMN) includes single-species/taxon databases on 20 individual species, but at the center of PMN is PlantCyc with over 800 pathways of 350 plant species (<http://www.plantcyc.org/about/plantcyc-species>).

Field Code Changed

Field Code Changed

Field Code Changed

**Commented [LPdS17]:** Reviewer #2:  
I 743: Brachypodium instead of Bracypodium.

**Formatted:** Font: 12 pt, English (United States)

1  
2  
3  
4  
5  
6  
7  
8  
9  
10  
11  
12  
13  
14  
15  
16  
17  
18  
19  
20  
21  
22  
23  
24  
25  
26  
27  
28  
29  
30  
31  
32  
33  
34  
35  
36  
37  
38  
39  
40  
41  
42  
43  
44  
45  
46  
47  
48  
49  
50  
51  
52  
53  
54  
55  
56  
57  
58  
59  
60  
61  
62  
63  
64  
65

BioMeta [203], whose contents are based on the KEGG Ligand database with a large number of chemical structures corrected with respect to constitution and reactions' stereochemistry being correctly balanced. BKM-react [204] is a non-redundant biochemical reaction database containing 18,172 unique biochemical reactions retrieved from BRENDA, KEGG, and MetaCyc databases that were matched and integrated by aligning substrates and products. Similar to this MetRxn [205], also integrates information from BRENDA, KEGG and MetaCyc, combining also Reactome.org and 44 metabolic models in a standardized description of metabolites and reactions where all metabolites have matched synonyms, resolved protonation states, and are linked to unique structures, and all reactions are balanced.

Together with the development of many prediction tools previously mentioned we watched in the last years the development of some interesting *In Silico* databases that are extremely useful for *de novo* metabolite identification such as MINE [206], a database developed by the integration of an algorithm called Biochemical Network Integrated Computational Explorer (BNICE) and expert-curated reaction rules to predict chemical structures product of enzyme promiscuity, MetCCS [207], a database and algorithm for prediction of Collision Cross-Section values for metabolites in ion mobility mass spectrometry, a technique increasingly used to assist metabolite elucidation based on the drift speed of the ion that is proportional to its cross section, and the plant specific ISDB [208], an *in silico* database of natural products generated using CFM-ID [129] with input from the commercial Dictionary of Natural Products.

**Other programs of interest**

The complexity of metabolomics data experiments, particularly in terms of sample number and metadata pushed the development of many tools for experiment and metadata management, and while many of these functions are integrated in some of the databases previously discussed there are a few specialized tools such as QTREDS [209] and MASTR-MS [210], that are LIMS based software for assisting in organizing experimental design, metadata management and sample data acquisition, MetaDB [211], a web application for Metabolomics metadata management with interface to MetaMS data processing tool, and Metabolonote [212], a metadata database/management system.

The enormous amount of data available for metabolomics raises many questions regarding how to easily access and unify all this data, taking into account the vast chemical space explored in these experiments. Many tools have been developed with the purpose of facilitating access to chemical data spread in the literature, from the development of identifiers to reduce duplication of information such as the SPLASH [213] hash designed for the MoNA database, to tools like Metmask [214], for managing different identifiers, [Chemical Translation Service \(CTS\)](#) [215], for translation of chemical identifiers, PhenoMeter [216] for querying databases based on metabolic phenotype and Metab2MeSH [217] for a

Field Code Changed

**Commented [LPdS18]:** I 766: maybe cite here services that allow conversion between different types of metabolite chemical information like the chemical translation service: <http://cts.fiehnlab.ucdavis.edu/>  
Reply: It was cited with the acronym CTS.

Field Code Changed

Field Code Changed

Field Code Changed







1  
2  
3  
4  
5  
6  
7  
8  
9  
10  
11  
12  
13  
14  
15  
16  
17  
18  
19  
20  
21  
22  
23  
24  
25  
26  
27  
28  
29  
30  
31  
32  
33  
34  
35  
36  
37  
38  
39  
40  
41  
42  
43  
44  
45  
46  
47  
48  
49  
50  
51  
52  
53  
54  
55  
56  
57  
58  
59  
60  
61  
62  
63  
64  
65

number of clear reporting standards that should aid in this respect [261], furthermore, both the existing databases and carefully compared meta-analysis [22, 262], demonstrate that such approaches are indeed highly powerful in the enhancement of biological understanding. As such we feel that it is an urgent priority to focus efforts on the improvement of this feature of computational metabolomics since it will aid not only in the expansion of our coverage of the metabolite complement of the plant cell but also in the equally important task of interpreting the biological function of the individual metabolites themselves.

**Competing interests**

The authors declare that they have no competing interests.

**Acknowledgement**

We thank the Max Planck Society, the National Council for Scientific and Technological Development CNPq-Brazil (LPS) and the IMPRS-PMPG program (TN) for the financial support.

**References**

1. Oliver SG, Winson MK, Kell DB and Baganz F. Systematic functional analysis of the yeast genome. *Trends Biotechnol.* 1998;16 9:373-8. doi:10.1016/s0167-7799(98)01214-1.
2. Fiehn O, Kopka J, Dormann P, Altmann T, Trethewey RN and Willmitzer L. Metabolite profiling for plant functional genomics. *Nat Biotechnol.* 2000;18 11:1157-61. doi:10.1038/81137.
3. Sauter H, Lauer M and Fritsch H. METABOLIC PROFILING OF PLANTS - A NEW DIAGNOSTIC-TECHNIQUE. *Abstr Pap Am Chem Soc.* 1988;195:129-AGRO.
4. Dorr JR, Yu Y, Milanovic M, Beuster G, Zasada C, Dabritz JHM, et al. Synthetic lethal metabolic targeting of cellular senescence in cancer therapy. *Nature.* 2013;501 7467:421-+. doi:10.1038/nature12437.
5. Kell DB. Metabolomics and systems biology: making sense of the soup. *Current Opinion in Microbiology.* 2004;7 3:296-307. doi:10.1016/j.mib.2004.04.012.
6. Nicholson JK and Wilson ID. Understanding 'global' systems biology: Metabonomics and the continuum of metabolism. *Nature Reviews Drug Discovery.* 2003;2 8:668-76. doi:10.1038/nrd1157.
7. Fernie AR and Schauer N. Metabolomics-assisted breeding: a viable option for crop improvement? *Trends in Genetics.* 2009;25 1:39-48. doi:10.1016/j.tig.2008.10.010.
8. Meyer RC, Steinfath M, Lisek J, Becher M, Witucka-Wall H, Torjek O, et al. The metabolic signature related to high plant growth rate in *Arabidopsis thaliana*. *Proceedings of the National Academy of Sciences of the United States of America.* 2007;104 11:4759-64. doi:10.1073/pnas.0609709104.
9. Roessner U, Willmitzer L and Fernie AR. Metabolic profiling and biochemical phenotyping of plant systems. *Plant Cell Reports.* 2002;21 3:189-96. doi:10.1007/s00299-002-0510-8.
10. Schauer N and Fernie AR. Plant metabolomics: towards biological function and mechanism. *Trends in Plant Science.* 2006;11 10:508-16. doi:10.1016/j.tplants.2006.08.007.

Field Code Changed  
Field Code Changed  
Field Code Changed

1  
2  
3  
4  
5  
6  
7  
8  
9  
10  
11  
12  
13  
14  
15  
16  
17  
18  
19  
20  
21  
22  
23  
24  
25  
26  
27  
28  
29  
30  
31  
32  
33  
34  
35  
36  
37  
38  
39  
40  
41  
42  
43  
44  
45  
46  
47  
48  
49  
50  
51  
52  
53  
54  
55  
56  
57  
58  
59  
60  
61  
62  
63  
64  
65

11. Weckwerth W. Metabolomics in systems biology. *Annu Rev Plant Biol.* 2003;54:669-89. doi:10.1146/annurev.arplant.54.031902.135014.

12. Fernie AR and Stitt M. On the Discordance of Metabolomics with Proteomics and Transcriptomics: Coping with Increasing Complexity in Logic, Chemistry, and Network Interactions. *Plant Physiology.* 2012;158 3:1139-45. doi:10.1104/pp.112.193235.

13. Nobeli I, Ponstingl H, Krissinel EB and Thornton JM. A structure-based anatomy of the E-coli metabolome. *Journal of Molecular Biology.* 2003;334 4:697-719. doi:10.1016/j.jmb.2003.10.008.

14. van der Werf MJ, Overkamp KM, Muilwijk B, Coulier L and Hankemeier T. Microbial metabolomics: Toward a platform with full metabolome coverage. *Analytical Biochemistry.* 2007;370 1:17-25. doi:10.1016/j.ab.2007.07.022.

15. Tohge T, Scossa F and Fernie AR. Integrative Approaches to Enhance Understanding of Plant Metabolic Pathway Structure and Regulation. *Plant Physiology.* 2015;169 3:1499-511. doi:10.1104/pp.15.01006.

16. Sulpice R, Pyl E-T, Ishihara H, Trenkamp S, Steinfath M, Witucka-Wall H, et al. Starch as a major integrator in the regulation of plant growth. *Proceedings of the National Academy of Sciences.* 2009;106 25:10348-53. doi:10.1073/pnas.0903478106.

17. Davey MP, Burrell MM, Woodward FI and Quick WP. Population-specific metabolic phenotypes of *Arabidopsis lyrata* ssp. *petraea*. *New Phytologist.* 2008;177 2:380-8. doi:10.1111/j.1469-8137.2007.02282.x.

18. Beleggia R, Rau D, Laidò G, Platani C, Nigro F, Fragasso M, et al. Evolutionary Metabolomics Reveals Domestication-Associated Changes in Tetraploid Wheat Kernels. *Molecular Biology and Evolution.* 2016;33 7:1740-53. doi:10.1093/molbev/msw050.

19. Kliebenstein D. Advancing Genetic Theory and Application by Metabolic Quantitative Trait Loci Analysis. *The Plant Cell.* 2009;21 6:1637-46. doi:10.1105/tpc.109.067611.

20. Luo J. Metabolite-based genome-wide association studies in plants. *Current Opinion in Plant Biology.* 2015;24:31-8. doi:<http://dx.doi.org/10.1016/j.pbi.2015.01.006>.

21. Brotman Y, Landau U, Pnini S, Lisek J, Balazadeh S, Mueller-Roeber B, et al. The LysM receptor-like kinase LysM RLK1 is required to activate defense and abiotic-stress responses induced by overexpression of fungal chitinases in *Arabidopsis* plants. *Molecular plant.* 2012;5 5:1113-24.

22. Obata T and Fernie AR. The use of metabolomics to dissect plant responses to abiotic stresses. *Cellular and Molecular Life Sciences.* 2012;69 19:3225-43. doi:10.1007/s00018-012-1091-5.

23. Tohge T and Fernie AR. Web-based resources for mass-spectrometry-based metabolomics: A user's guide. *Phytochemistry.* 2009;70 4:450-6. doi:<http://dx.doi.org/10.1016/j.phytochem.2009.02.004>.

24. Hibbert DB. Experimental design in chromatography: A tutorial review. *Journal of Chromatography B.* 2012;910:2-13. doi:<http://dx.doi.org/10.1016/j.jchromb.2012.01.020>.

25. Gullberg J, Jonsson P, Nordström A, Sjöström M and Moritz T. Design of experiments: an efficient strategy to identify factors influencing extraction and derivatization of *Arabidopsis thaliana* samples in metabolomic studies with gas chromatography/mass spectrometry. *Analytical Biochemistry.* 2004;331 2:283-95. doi:<http://dx.doi.org/10.1016/j.ab.2004.04.037>.

26. Nistor I, Cao M, Debrus B, Lebrun P, Lecomte F, Rozet E, et al. Application of a new optimization strategy for the separation of tertiary alkaloids extracted from *Strychnos usambarensis* leaves. *Journal of Pharmaceutical and Biomedical Analysis.* 2011;56 1:30-7. doi:<http://dx.doi.org/10.1016/j.jpba.2011.04.027>.

27. Bradbury J, Genta-Jouve G, Allwood JW, Dunn WB, Goodacre R, Knowles JD, et al. MUSCLE: automated multi-objective evolutionary optimization of targeted LC-MS/MS analysis. *Bioinformatics.* 2015;31 6:975-7. doi:10.1093/bioinformatics/btu740.

Formatted: Portuguese (Brazil)

Field Code Changed

1  
2  
3  
4  
5  
6  
7  
8  
9  
10  
11  
12  
13  
14  
15  
16  
17  
18  
19  
20  
21  
22  
23  
24  
25  
26  
27  
28  
29  
30  
31  
32  
33  
34  
35  
36  
37  
38  
39  
40  
41  
42  
43  
44  
45  
46  
47  
48  
49  
50  
51  
52  
53  
54  
55  
56  
57  
58  
59  
60  
61  
62  
63  
64  
65

28. Nikolskiy I, Siuzdak G and Patti GJ. Discriminating precursors of common fragments for large-scale metabolite profiling by triple quadrupole mass spectrometry. *Bioinformatics*. 2015;31 12:2017-23.

29. Katajamaa M and Orešič M. Data processing for mass spectrometry-based metabolomics. *Journal of Chromatography A*. 2007;1158 1–2:318-28. doi:<http://dx.doi.org/10.1016/j.chroma.2007.04.021>.

30. Sugimoto M, Kawakami M, Robert M, Soga T and Tomita M. Bioinformatics tools for mass spectroscopy-based metabolomic data processing and analysis. *Current bioinformatics*. 2012;7 1:96-108.

31. Lange E, Tautenhahn R, Neumann S and Gröpl C. Critical assessment of alignment procedures for LC-MS proteomics and metabolomics measurements. *BMC Bioinformatics*. 2008;9:375-. doi:10.1186/1471-2105-9-375.

32. Tautenhahn R, Böttcher C and Neumann S. Highly sensitive feature detection for high resolution LC/MS. *BMC Bioinformatics*. 2008;9 1:504. doi:10.1186/1471-2105-9-504.

33. Lommen A. MetAlign: interface-driven, versatile metabolomics tool for hyphenated full-scan mass spectrometry data preprocessing. *Analytical Chemistry*. 2009;81 8:3079-86.

34. Smith CA, Want EJ, O'Maille G, Abagyan R and Siuzdak G. XCMS: processing mass spectrometry data for metabolite profiling using nonlinear peak alignment, matching, and identification. *Analytical Chemistry*. 2006;78 doi:10.1021/ac051437y.

35. Tengstrand E, Lindberg J and Åberg KM. TracMass 2.0: A Modular Suite of Tools for Processing Chromatography-Full Scan Mass Spectrometry Data. *Analytical Chemistry*. 2014;86 7:3435-42.

36. Chang H-Y, Chen C-T, Lih TM, Lynn K-S, Juo C-G, Hsu W-L, et al. iMet-Q: A User-Friendly Tool for Label-Free Metabolomics Quantitation Using Dynamic Peak-Width Determination. *PLoS One*. 2016;11 1:e0146112. doi:10.1371/journal.pone.0146112.

37. Treviño V, Yañez-Garza IL, Rodríguez-López CE, Urrea-López R, Garza-Rodríguez ML, Barrera-Saldaña HA, et al. GridMass: a fast two-dimensional feature detection method for LC/MS. *Journal of Mass Spectrometry*. 2015;50 1:165-74.

38. Duran AL, Yang J, Wang L and Sumner LW. Metabolomics spectral formatting, alignment and conversion tools (MSFACTS). *Bioinformatics*. 2003;19 17:2283-93.

39. Broeckling CD, Reddy IR, Duran AL, Zhao X and Sumner LW. MET-IDEA: data extraction tool for mass spectrometry-based metabolomics. *Analytical Chemistry*. 2006;78 13:4334-41.

40. Fructuoso S, Sevilla Á, Bernal C, Lozano AB, Iborra JL and Cánovas M. EasyLCMS: an asynchronous web application for the automated quantification of LC-MS data. *BMC research notes*. 2012;5 1:428.

41. Creek DJ, Jankevics A, Burgess KE, Breitling R and Barrett MP. IDEOM: an Excel interface for analysis of LC-MS-based metabolomics data. *Bioinformatics*. 2012;28 7:1048-9.

42. Conley CJ, Smith R, Torgrip RJ, Taylor RM, Tautenhahn R and Prince JT. Massifquant: open-source Kalman filter-based XC-MS isotope trace feature detection. *Bioinformatics*. 2014;30 18:2636-43.

43. Zhang W, Chang J, Lei Z, Huhman D, Sumner LW and Zhao PX. MET-COFEA: a liquid chromatography/mass spectrometry data processing platform for metabolite compound feature extraction and annotation. *Analytical Chemistry*. 2014;86 13:6245-53.

44. Zhang W, Lei Z, Huhman D, Sumner LW and Zhao PX. MET-XAlign: A metabolite cross-alignment tool for LC/MS-based comparative metabolomics. *Analytical Chemistry*. 2015;87 18:9114-9.

45. Yu T, Park Y, Johnson JM and Jones DP. apLCMS—adaptive processing of high-resolution LC/MS data. *Bioinformatics*. 2009;25 15:1930-6.

46. Uppal K, Soltow QA, Strobel FH, Pittard WS, Gernert KM, Yu T, et al. xMSanalyzer: automated pipeline for improved feature detection and downstream analysis of large-scale, non-targeted metabolomics data. *BMC Bioinformatics*. 2013;14 1:15.

Field Code Changed

Formatted: Portuguese (Brazil)



1  
2  
3  
4  
5  
6  
7  
8  
9  
10  
11  
12  
13  
14  
15  
16  
17  
18  
19  
20  
21  
22  
23  
24  
25  
26  
27  
28  
29  
30  
31  
32  
33  
34  
35  
36  
37  
38  
39  
40  
41  
42  
43  
44  
45  
46  
47  
48  
49  
50  
51  
52  
53  
54  
55  
56  
57  
58  
59  
60  
61  
62  
63  
64  
65

47. Myint L, Kleensang A, Zhao L, Hartung T and Hansen KD. Joint bounding of peaks across samples improves differential analysis in mass spectrometry-based metabolomics. *Analytical Chemistry*. 2017; doi:10.1021/acs.analchem.6b04719.

48. Wandy J, Daly R, Breitling R and Rogers S. Incorporating peak grouping information for alignment of multiple liquid chromatography-mass spectrometry datasets. *Bioinformatics*. 2015;31 12:1999-2006.

49. Wehrens R, Bloemberg TG and Eilers PH. Fast parametric time warping of peak lists. *Bioinformatics*. 2015;31 18:3063-5.

50. Stein SE. An integrated method for spectrum extraction and compound identification from gas chromatography/mass spectrometry data. *Journal of the American Society for Mass Spectrometry*. 1999;10 8:770-81. doi:[http://dx.doi.org/10.1016/S1044-0305\(99\)00047-1](http://dx.doi.org/10.1016/S1044-0305(99)00047-1).

51. Aggio R, Villas SG and Ruggiero K. Metab: an R package for high-throughput analysis of metabolomics data generated by GC-MS. *Bioinformatics*. 2011;27 16:2316-8.

52. Bunk B, Kucklick M, Jonas R, Münch R, Schober M, Jahn D, et al. MetaQuant: a tool for the automatic quantification of GC/MS-based metabolome data. *Bioinformatics*. 2006;22 23:2962-5.

53. Hiller K, Hangebrauk J, Jäger C, Spura J, Schreiber K and Schomburg D. MetaboliteDetector: comprehensive analysis tool for targeted and nontargeted GC/MS based metabolome analysis. *Analytical Chemistry*. 2009;81 9:3429-39.

54. Luedemann A, Strassburg K, Erban A and Kopka J. TagFinder for the quantitative analysis of gas chromatography—mass spectrometry (GC-MS)-based metabolite profiling experiments. *Bioinformatics*. 2008;24 5:732-7.

55. Cuadros-Inostroza Á, Caldana C, Redestig H, Kusano M, Lisek J, Peña-Cortés H, et al. TargetSearch—a Bioconductor package for the efficient preprocessing of GC-MS metabolite profiling data. *BMC Bioinformatics*. 2009;10 1:428.

56. O'Callaghan S, De Souza DP, Isaac A, Wang Q, Hodkinson L, Olshansky M, et al. PyMS: a Python toolkit for processing of gas chromatography-mass spectrometry (GC-MS) data. Application and comparative study of selected tools. *BMC Bioinformatics*. 2012;13 1:115.

57. Jellema RH, Krishnan S, Hendriks MM, Muilwijk B and Vogels JT. Deconvolution using signal segmentation. *Chemometrics and Intelligent Laboratory Systems*. 2010;104 1:132-9.

58. Wehrens R, Weingart G and Mattivi F. metaMS: An open-source pipeline for GC–MS-based untargeted metabolomics. *Journal of Chromatography B*. 2014;966:109-16.

59. Kuich PHJ, Hoffmann N and Kempa S. Maui-VIA: a user-friendly software for visual identification, alignment, correction, and quantification of gas chromatography–mass spectrometry data. *Frontiers in bioengineering and biotechnology*. 2014;2.

60. Domingo-Almenara X, Brezmes J, Vinaixa M, Samino S, Ramirez N, Ramon-Krauel M, et al. eRah: A Computational Tool Integrating Spectral Deconvolution and Alignment with Quantification and Identification of Metabolites in GC/MS-Based Metabolomics. *Analytical Chemistry*. 2016;88 19:9821-9.

61. Ni Y, Su M, Qiu Y, Jia W and Du X. ADAP-GC 3.0: Improved Peak Detection and Deconvolution of Co-eluting Metabolites from GC/TOF-MS Data for Metabolomics Studies. *Analytical Chemistry*. 2016;88 17:8802-11.

62. Wei X, Shi X, Koo I, Kim S, Schmidt RH, Arteel GE, et al. MetPP: a computational platform for comprehensive two-dimensional gas chromatography time-of-flight mass spectrometry-based metabolomics. *Bioinformatics*. 2013;29 14:1786-92. doi:10.1093/bioinformatics/btt275.

63. Kuhl C, Tautenhahn R, Böttcher C, Larson TR and Neumann S. CAMERA: An Integrated Strategy for Compound Spectra Extraction and Annotation of Liquid Chromatography/Mass Spectrometry Data Sets. *Analytical Chemistry*. 2012;84 1:283-9. doi:10.1021/ac202450g.

64. Alonso A, Julià A, Beltran A, Vinaixa M, Díaz M, Ibañez L, et al. AStream: an R package for annotating LC/MS metabolomic data. *Bioinformatics*. 2011;27 9:1339-40.

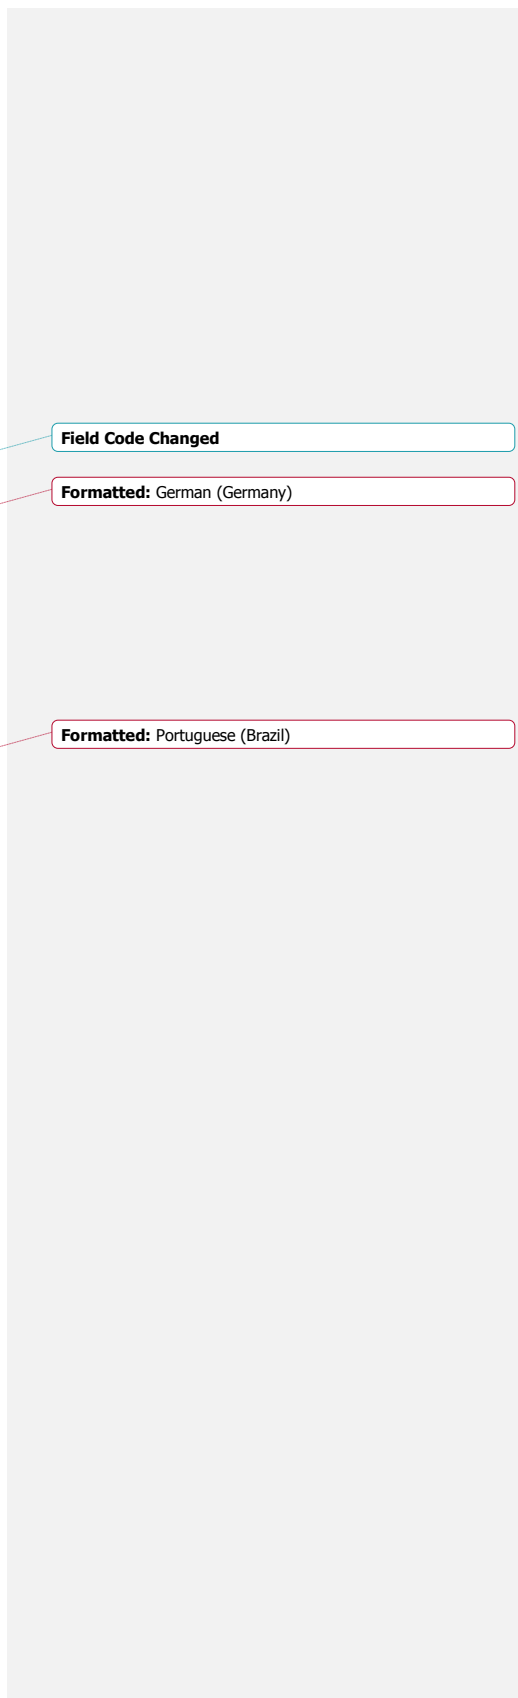

Field Code Changed

Formatted: German (Germany)

Formatted: Portuguese (Brazil)

1  
2  
3  
4  
5  
6  
7  
1138 65. Kessler N, Walter F, Persicke M, Albaum SP, Kalinowski J, Goesmann A, et al. Allocator: An  
1139 interactive web platform for the analysis of metabolomic LC-ESI-MS datasets, enabling semi-  
1140 automated, user-revised compound annotation and mass isotopomer ratio analysis. *PLoS*  
1141 *One*. 2014;9 11:e113909.

1142 66. Tikunov Y, Laptinok S, Hall R, Bovy A and De Vos R. MSCLust: a tool for unsupervised mass  
1143 spectra extraction of chromatography-mass spectrometry ion-wise aligned data.  
1144 *Metabolomics*. 2012;8 4:714-8.

1145 67. Broeckling CD, Afsar F, Neumann S, Ben-Hur A and Prenni J. RAMClust: a novel feature  
1146 clustering method enables spectral-matching-based annotation for metabolomics data.  
1147 *Analytical Chemistry*. 2014;86 14:6812-7.

1148 68. Gu H, Gowda GN, Neto FC, Opp MR and Raftery D. RAMSY: ratio analysis of mass  
1149 spectrometry to improve compound identification. *Analytical Chemistry*. 2013;85 22:10771-  
1150 9.

1151 69. Chen G, Cui L, Teo GS, Ong CN, Tan CS and Choi H. MetTailor: dynamic block summary and  
1152 intensity normalization for robust analysis of mass spectrometry data in metabolomics.  
1153 *Bioinformatics*. 2015:btv434.

1154 70. Chawade A, Alexandersson E and Levander F. Normalyzer: a tool for rapid evaluation of  
1155 normalization methods for omics data sets. *Journal of Proteome Research*. 2014;13 6:3114-  
1156 20.

1157 71. Fernández-Albert F, Llorach R, Garcia-Aloy M, Ziyatdinov A, Andres-Lacueva C and Perera A.  
1158 Intensity drift removal in LC/MS metabolomics by common variance compensation.  
1159 *Bioinformatics*. 2014;30 20:2899-905.

1160 72. Shen X, Gong X, Cai Y, Guo Y, Tu J, Li H, et al. Normalization and integration of large-scale  
1161 metabolomics data using support vector regression. *Metabolomics*. 2016;12 5:1-12.

1162 73. Karpievitch YV, Nikolic SB, Wilson R, Sharman JE and Edwards LM. Metabolomics Data  
1163 Normalization with EigenMS. *PLoS One*. 2015;9 12:e116221.  
1164 doi:10.1371/journal.pone.0116221.

1165 74. Styczynski MP, Moxley JF, Tong LV, Walther JL, Jensen KL and Stephanopoulos GN.  
1166 Systematic identification of conserved metabolites in GC/MS data for metabolomics and  
1167 biomarker discovery. *Analytical Chemistry*. 2007;79 3:966-73.

1168 75. Baran R, Kochi H, Saito N, Suematsu M, Soga T, Nishioka T, et al. MathDAMP: a package for  
1169 differential analysis of metabolite profiles. *BMC Bioinformatics*. 2006;7 1:530.

1170 76. Huege J, Goetze J, Dethloff F, Junker B and Kopka J. Quantification of stable isotope label in  
1171 metabolites via mass spectrometry. *Plant Chemical Genomics: Methods and Protocols*.  
1172 2014:213-23.

1173 77. Millard P, Letisse F, Sokol S and Portais J-C. IsoCor: correcting MS data in isotope labeling  
1174 experiments. *Bioinformatics*. 2012;28 9:1294-6.

1175 78. Jungreuthmayer C, Neubauer S, Mairinger T, Zanghellini J and Hann S. ICT: isotope correction  
1176 toolbox. *Bioinformatics*. 2016;32 1:154-6.

1177 79. Chokkathukalam A, Jankevics A, Creek DJ, Achcar F, Barrett MP and Breitling R. mzMatch-  
1178 ISO: an R tool for the annotation and relative quantification of isotope-labelled mass  
1179 spectrometry data. *Bioinformatics*. 2013;29 2:281-3.

1180 80. Bueschl C, Kluger B, Berthiller F, Lirk G, Winkler S, Kraska R, et al. MetExtract: a new software  
1181 tool for the automated comprehensive extraction of metabolite-derived LC/MS signals in  
1182 metabolomics research. *Bioinformatics*. 2012;28 5:736-8.

1183 81. Huang X, Chen Y-J, Cho K, Nikolskiy I, Crawford PA and Patti GJ. X13CMS: global tracking of  
1184 isotopic labels in untargeted metabolomics. *Analytical Chemistry*. 2014;86 3:1632-9.

1185 82. Capellades J, Navarro M, Samino S, Garcia-Ramirez M, Hernandez C, Simo R, et al. geoRge: A  
1186 computational tool to detect the presence of stable isotope labeling in LC/MS-based  
1187 untargeted metabolomics. *Analytical Chemistry*. 2015;88 1:621-8.

52  
53  
54  
55  
56  
57  
58  
59  
60  
61  
62  
63  
64  
65

1  
2  
3  
4  
5  
6  
7  
8  
9  
10  
11  
12  
13  
14  
15  
16  
17  
18  
19  
20  
21  
22  
23  
24  
25  
26  
27  
28  
29  
30  
31  
32  
33  
34  
35  
36  
37  
38  
39  
40  
41  
42  
43  
44  
45  
46  
47  
48  
49  
50  
51  
52  
53  
54  
55  
56  
57  
58  
59  
60  
61  
62  
63  
64  
65

1188 83. Weindl D, Wegner A and Hiller K. MIA: non-targeted mass isotopologue analysis. *Bioinformatics*. 2016;btw317.

1189 84. Cai Y, Weng K, Guo Y, Peng J and Zhu Z-J. An integrated targeted metabolomic platform for high-throughput metabolite profiling and automated data processing. *Metabolomics*. 2015;11 6:1575-86.

1190 85. Wong JW, Abuhusain HJ, McDonald KL and Don AS. MMSAT: automated quantification of metabolites in selected reaction monitoring experiments. *Analytical Chemistry*. 2011;84 1:470-4.

1191 86. Tsugawa H, Arita M, Kanazawa M, Ogiwara A, Bamba T and Fukusaki E. MRMPROBS: A data assessment and metabolite identification tool for large-scale multiple reaction monitoring based widely targeted metabolomics. *Analytical Chemistry*. 2013;85 10:5191-9.

1192 87. Nikolskiy I, Mahieu NG, Chen Y-J, Tautenhahn R and Patti GJ. An untargeted metabolomic workflow to improve structural characterization of metabolites. *Analytical Chemistry*. 2013;85 16:7713-9.

1193 88. Tsugawa H, Cajka T, Kind T, Ma Y, Higgins B, Ikeda K, et al. MS-DIAL: data-independent MS/MS deconvolution for comprehensive metabolome analysis. *Nature methods*. 2015;12 6:523-6.

1194 89. Li H, Cai Y, Guo Y, Chen F and Zhu Z-J. MetDIA: Targeted Metabolite Extraction of Multiplexed MS/MS Spectra Generated by Data-Independent Acquisition. *Analytical Chemistry*. 2016;88 17:8757-64.

1195 90. Libiseller G, Dvorzak M, Kleb U, Gander E, Eisenberg T, Madeo F, et al. IPO: a tool for automated optimization of XCMS parameters. *BMC Bioinformatics*. 2015;16 1:118.

1196 91. Mahieu NG, Huang X, Chen Y-J and Patti GJ. Credentialing features: a platform to benchmark and optimize untargeted metabolomic methods. *Analytical Chemistry*. 2014;86 19:9583-9.

1197 92. Brodsky L, Moussaieff A, Shahaf N, Aharoni A and Rogachev I. Evaluation of Peak Picking Quality in LC-MS Metabolomics Data. *Analytical Chemistry*. 2010;82 22:9177-87.

1198 93. Ranjbar MRN, Di Poto C, Wang Y and Ressom HW. Simat: Gc-sim-ms data analysis tool. *BMC Bioinformatics*. 2015;16 1:259.

1199 94. Mak TD, Laiakis EC, Goudarzi M and Fornace Jr AJ. Metabolizer: A novel statistical workflow for analyzing postprocessed lc-ms metabolomics data. *Analytical Chemistry*. 2013;86 1:506-13.

1200 95. Kastenmüller G, Römisch-Margl W, Wägele B, Altmaier E and Suhre K. metaP-server: a web-based metabolomics data analysis tool. *BioMed Research International*. 2010;2011.

1201 96. Fitzpatrick MA, McGrath CM and Young SP. Pathomx: an interactive workflow-based tool for the analysis of metabolomic data. *BMC Bioinformatics*. 2014;15 1:396.

1202 97. Hughes G, Cruickshank-Quinn C, Reisdorph R, Lutz S, Petrache I, Reisdorph N, et al. MSPrep—Summarization, normalization and diagnostics for processing of mass spectrometry-based metabolomic data. *Bioinformatics*. 2014;30 1:133-4.

1203 98. Sun X and Weckwerth W. COVAIN: a toolbox for uni- and multivariate statistics, time-series and correlation network analysis and inverse estimation of the differential Jacobian from metabolomics covariance data. *Metabolomics*. 2012;8 1:81-93.

1204 99. Glaab E and Schneider R. RepExplore: Addressing technical replicate variance in proteomics and metabolomics data analysis. *Bioinformatics*. 2015;btv127.

1205 100. Zhan X, Patterson AD and Ghosh D. Kernel approaches for differential expression analysis of mass spectrometry-based metabolomics data. *BMC Bioinformatics*. 2015;16 1:77.

1206 101. Nodzinski M, Muehlbauer MJ, Bain JR, Reisetter AC, Lowe WL and Scholtens DM. Metabomxtr: an R package for mixture-model analysis of non-targeted metabolomics data. *Bioinformatics*. 2014;30 22:3287-8.

1207 102. Suvitaival T, Rogers S and Kaski S. Stronger findings from mass spectral data through multi-peak modeling. *BMC Bioinformatics*. 2014;15 1:208.

Formatted: German (Germany)

1  
2  
3  
4  
5  
6  
7  
1238 103. Mak TD, Laiakis EC, Goudarzi M and Fornace Jr AJ. Selective paired ion contrast analysis: a  
1239 novel algorithm for analyzing postprocessed LC-MS metabolomics data possessing high  
1240 experimental noise. *Analytical Chemistry*. 2015;87 6:3177-86.

1241 104. Ernest B, Gooding JR, Campagna SR, Saxton AM and Voy BH. MetabR: an R script for linear  
1242 model analysis of quantitative metabolomic data. *BMC research notes*. 2012;5 1:596.

1243 105. Huang J-H, Yan J, Wu Q-H, Ferro MD, Yi L-Z, Lu H-M, et al. Selective of informative  
1244 metabolites using random forests based on model population analysis. *Talanta*.  
1245 2013;117:549-55.

1246 106. Simader AM, Kluger B, Neumann NKN, Bueschl C, Lemmens M, Lirk G, et al. QCScreen: a  
1247 software tool for data quality control in LC-HRMS based metabolomics. *BMC Bioinformatics*.  
1248 2015;16 1:341.

1249 107. Fernie AR. The future of metabolic phytochemistry: Larger numbers of metabolites, higher  
1250 resolution, greater understanding. *Phytochemistry*. 2007;68 22-24:2861-80.  
1251 doi:<http://dx.doi.org/10.1016/j.phytochem.2007.07.010>.

1252 108. Tohge T, Wendenburg R, Ishihara H, Nakabayashi R, Watanabe M, Sulpice R, et al.  
1253 Characterization of a recently evolved flavonol-phenylacyltransferase gene provides  
1254 signatures of natural light selection in Brassicaceae. *Nature communications*. 2016;7.  
1255 Schymanski E and Neumann S. CASMI: And the Winner is. *Metabolites*. 2013;3 2:412.

1256 110. Schymanski EL, Ruttkies C, Krauss M, Brouard C, Kind T, Dührkop K, et al. Critical Assessment  
1257 of Small Molecule Identification 2016: automated methods. *Journal of Cheminformatics*.  
1258 2017;9 1:22. doi:10.1186/s13321-017-0207-1.

1259 111. Zhou B, Wang J and Ressom HW. MetaboSearch: tool for mass-based metabolite  
1260 identification using multiple databases. *PLoS One*. 2012;7 6:e40096.

1261 112. Brown M, Wedge DC, Goodacre R, Kell DB, Baker PN, Kenny LC, et al. Automated workflows  
1262 for accurate mass-based putative metabolite identification in LC/MS-derived metabolomic  
1263 datasets. *Bioinformatics*. 2011;27 8:1108-12.

1264 113. Daly R, Rogers S, Wandy J, Jankevics A, Burgess KE and Breitling R. MetAssign: probabilistic  
1265 annotation of metabolites from LC-MS data using a Bayesian clustering approach.  
1266 *Bioinformatics*. 2014;30 19:2764-71.

1267 114. Böcker S, Letzel MC, Lipták Z and Pervukhin A. SIRIUS: decomposing isotope patterns for  
1268 metabolite identification. *Bioinformatics*. 2009;25 2:218-24.

1269 115. Sakurai N, Ara T, Kanaya S, Nakamura Y, Iijima Y, Enomoto M, et al. An application of a  
1270 relational database system for high-throughput prediction of elemental compositions from  
1271 accurate mass values. *Bioinformatics*. 2013;29 2:290-1.

1272 116. Lommen A. Ultrafast PubChem searching combined with improved filtering rules for  
1273 elemental composition analysis. *Analytical Chemistry*. 2014;86 11:5463-9.

1274 117. Tsugawa H, Kind T, Nakabayashi R, Yukihira D, Tanaka W, Cajka T, et al. Hydrogen  
1275 Rearrangement Rules: Computational MS/MS Fragmentation and Structure Elucidation  
1276 Using MS-FINDER Software. *Analytical Chemistry*. 2016;88 16:7946-58.  
1277 doi:10.1021/acs.analchem.6b00770.

1278 118. Ma Y, Kind T, Yang D, Leon C and Fiehn O. MS2Analyzer: A software for small molecule  
1279 substructure annotations from accurate tandem mass spectra. *Analytical Chemistry*. 2014;86  
1280 21:10724-31.

1281 119. van der Hooft JJJ, Wandy J, Barrett MP, Burgess KEV and Rogers S. Topic modeling for  
1282 untargeted substructure exploration in metabolomics. *Proceedings of the National Academy  
1283 of Sciences*. 2016;113 48:13738-43. doi:10.1073/pnas.1608041113.

1284 120. Dhanasekaran AR, Pearson JL, Ganesan B and Weimer BC. Metabolome searcher: a high  
1285 throughput tool for metabolite identification and metabolic pathway mapping directly from  
1286 mass spectrometry and using genome restriction. *BMC Bioinformatics*. 2015;16 1:62.

1287 121. Suhre K and Schmitt-Kopplin P. MassTRIX: mass translator into pathways. *Nucleic acids  
1288 research*. 2008;36 suppl 2:W481-W4.

Formatted: German (Germany)

Field Code Changed

Formatted: German (Germany)

53  
54  
55  
56  
57  
58  
59  
60  
61  
62  
63  
64  
65

1  
2  
3  
4  
5  
6  
7  
1289 122. Uppal K, Soltow QA, Promislow DE, Wachtman LM, Quyyumi AA and Jones DP. MetabNet: an  
1290 R package for metabolic association analysis of high-resolution metabolomics data. *Frontiers*  
1291 *in bioengineering and biotechnology*. 2015;3:87.

10292 123. Silva RR, Jourdan F, Salvanha DM, Letisse F, Jamin EL, Guidetti-Gonzalez S, et al. ProbMetab:  
1293 an R package for Bayesian probabilistic annotation of LC-MS-based metabolomics.  
1294 *Bioinformatics*. 2014;30 9:1336-7.

1295 124. Rogers S, Scheltema RA, Girolami M and Breitling R. Probabilistic assignment of formulas to  
1296 mass peaks in metabolomics experiments. *Bioinformatics*. 2009;25 4:512-8.  
1297 doi:10.1093/bioinformatics/btn642.

1298 125. Weber RJ and Viant MR. MI-Pack: Increased confidence of metabolite identification in mass  
1299 spectra by integrating accurate masses and metabolic pathways. *Chemometrics and*  
1300 *Intelligent Laboratory Systems*. 2010;104 1:75-82.

1301 126. Qiu F, Fine DD, Wherritt DJ, Lei Z and Sumner LW. PlantMAT: A Metabolomics Tool for  
1302 Predicting the Specialized Metabolic Potential of a System and for Large-Scale Metabolite  
1303 Identifications. *Analytical Chemistry*. 2016;88 23:11373-83.

1304 127. Ruttkies C, Schymanski EL, Wolf S, Hollender J and Neumann S. MetFrag relaunched:  
1305 incorporating strategies beyond in silico fragmentation. *Journal of cheminformatics*. 2016;8  
1306 1:3.

1307 128. Menikarachchi LC, Cawley S, Hill DW, Hall LM, Hall L, Lai S, et al. MolFind: a software package  
1308 enabling HPLC/MS-based identification of unknown chemical structures. *Analytical*  
1309 *Chemistry*. 2012;84 21:9388-94.

1310 129. Allen F, Pon A, Wilson M, Greiner R and Wishart D. CFM-ID: a web server for annotation,  
1311 spectrum prediction and metabolite identification from tandem mass spectra. *Nucleic acids*  
1312 *research*. 2014;42 W1:W94-W9.

1313 130. Ridder L, van der Hooff JJ and Verhoeven S. Automatic compound annotation from mass  
1314 spectrometry data using MAGMa. *Mass Spectrometry*. 2014;3 Special\_Issue\_2:S0033-S.

1315 131. Heinonen M, Shen H, Zamboni N and Rousu J. Metabolite identification and molecular  
1316 fingerprint prediction through machine learning. *Bioinformatics*. 2012;28 18:2333-41.

1317 132. Dührkop K, Shen H, Meusel M, Rousu J and Böcker S. Searching molecular structure  
1318 databases with tandem mass spectra using CSI: FingerID. *Proceedings of the National*  
1319 *Academy of Sciences*. 2015;112 41:12580-5.

1320 133. Brouard C, Shen H, Dührkop K, d'Alché-Buc F, Böcker S and Rousu J. Fast metabolite  
1321 identification with Input Output Kernel Regression. *Bioinformatics*. 2016;32 12:i28-i36.  
1322 doi:10.1093/bioinformatics/btw246.

1323 134. Gerlich M and Neumann S. MetFusion: integration of compound identification strategies.  
1324 *Journal of Mass Spectrometry*. 2013;48 3:291-8.

1325 135. Leader DP, Burgess K, Creek D and Barrett MP. Pathos: A web facility that uses metabolic  
1326 maps to display experimental changes in metabolites identified by mass spectrometry. *Rapid*  
1327 *Communications in Mass Spectrometry*. 2011;25 22:3422-6.

1328 136. Pon A, Jewison T, Su Y, Liang Y, Knox C, Maciejewski A, et al. Pathways with PathWhiz.  
1329 *Nucleic acids research*. 2015:gkv399.

1330 137. Yamada T, Letunic I, Okuda S, Kanehisa M and Bork P. iPath2. 0: interactive pathway  
1331 explorer. *Nucleic acids research*. 2011;39 suppl 2:W412-W5.

1332 138. Kutmon M, van Iersel MP, Bohler A, Kelder T, Nunes N, Pico AR, et al. PathVisio 3: an  
1333 extendable pathway analysis toolbox. *PLoS Comput Biol*. 2015;11 2:e1004085.

1334 139. Pathan M, Keerthikumar S, Ang CS, Gangoda L, Quek CY, Williamson NA, et al. FunRich: An  
1335 open access standalone functional enrichment and interaction network analysis tool.  
1336 *Proteomics*. 2015;15 15:2597-601.

1337 140. Moreno P, Beisken S, Harsha B, Muthukrishnan V, Tudose I, Dekker A, et al. BiNChE: a web  
1338 tool and library for chemical enrichment analysis based on the ChEBI ontology. *BMC*  
1339 *Bioinformatics*. 2015;16 1:56.

53  
54  
55  
56  
57  
58  
59  
60  
61  
62  
63  
64  
65

- 1  
2  
3  
4  
5  
6  
7  
1340 141. Kankainen M, Gopalacharyulu P, Holm L and Orešič M. MPEA—metabolite pathway  
1341 enrichment analysis. *Bioinformatics*. 2011;27 13:1878-9.  
1342 142. Aggio RB, Ruggiero K and Villas-Bôas SG. Pathway Activity Profiling (PAPi): from the  
1343 metabolite profile to the metabolic pathway activity. *Bioinformatics*. 2010;26 23:2969-76.  
1344 143. Eichner J, Rosenbaum L, Wrzodek C, Häring H-U, Zell A and Lehmann R. Integrated  
1345 enrichment analysis and pathway-centered visualization of metabolomics, proteomics,  
1346 transcriptomics, and genomics data by using the InCroMAP software. *Journal of*  
1347 *Chromatography B*. 2014;966:77-82.  
1348 144. Carazzolle MF, de Carvalho LM, Slepicka HH, Vidal RO, Pereira GAG, Kobarg J, et al. IIS–  
1349 Integrated Interactome System: a web-based platform for the annotation, analysis and  
1350 visualization of protein-metabolite-gene-drug interactions by integrating a variety of data  
1351 sources and tools. *PLoS One*. 2014;9 6:e100385.  
1352 145. Sakurai N, Ara T, Ogata Y, Sano R, Ohno T, Sugiyama K, et al. KaPPA-View4: a metabolic  
1353 pathway database for representation and analysis of correlation networks of gene co-  
1354 expression and metabolite co-accumulation and omics data. *Nucleic acids research*. 2011;39  
1355 suppl 1:D677-D84.  
1356 146. Usadel B, Poree F, Nagel A, Lohse M, CZEDIK-EYSENBERG A and Stitt M. A guide to using  
1357 MapMan to visualize and compare Omics data in plants: a case study in the crop species,  
1358 Maize. *Plant, cell & environment*. 2009;32 9:1211-29.  
1359 147. Neuweger H, Persicke M, Albaum SP, Bekel T, Dondrup M, Hüser AT, et al. Visualizing post  
1360 genomics data-sets on customized pathway maps by ProMeTra—aeration-dependent gene  
1361 expression and metabolism of *Corynebacterium glutamicum* as an example. *BMC systems*  
1362 *biology*. 2009;3 1:82.  
1363 148. García-Alcalde F, García-López F, Dopazo J and Conesa A. Paintomics: a web based tool for  
1364 the joint visualization of transcriptomics and metabolomics data. *Bioinformatics*. 2011;27  
1365 1:137-9.  
1366 149. Rohn H, Junker A, Hartmann A, Grafahrend-Belau E, Treutler H, Klapperstück M, et al.  
1367 VANTED v2: a framework for systems biology applications. *BMC systems biology*. 2012;6  
1368 1:139.  
1369 150. López-Ibáñez J, Pazos F and Chagoyen M. MBROLE 2.0—functional enrichment of chemical  
1370 compounds. *Nucleic acids research*. 2016;44 W1:W201-W4.  
1371 151. Kamburov A, Cavill R, Ebbels TM, Herwig R and Keun HC. Integrated pathway-level analysis  
1372 of transcriptomics and metabolomics data with IMPaLA. *Bioinformatics*. 2011;27 20:2917-8.  
1373 152. Jourdan F, Breitling R, Barrett MP and Gilbert D. MetaNetter: inference and visualization of  
1374 high-resolution metabolomic networks. *Bioinformatics*. 2008;24 1:143-5.  
1375 153. Grapov D, Wanichthanarak K and Fiehn O. MetaMapR: pathway independent metabolomic  
1376 network analysis incorporating unknowns. *Bioinformatics*. 2015:btv194.  
1377 154. Lu J and Carlson HA. ChemTreeMap: an interactive map of biochemical similarity in  
1378 molecular datasets. *Bioinformatics*. 2016;32 23:3584-92.  
1379 doi:10.1093/bioinformatics/btw523.  
1380 155. Treutler H, Tsugawa H, Porzel A, Gorzolka K, Tissier A, Neumann S, et al. Discovering  
1381 Regulated Metabolite Families in Untargeted Metabolomics Studies. *Analytical Chemistry*.  
1382 2016;88 16:8082-90.  
1383 156. Naake T and Gaquerel E. MetCirc: Navigating mass spectral similarity in high-resolution  
1384 MS/MS metabolomics data. *Bioinformatics (Oxford, England)*. 2017.  
1385 157. Hamdalla MA, Rajasekaran S, Grant DF and Măndoiu II. Metabolic Pathway Predictions for  
1386 Metabolomics: A Molecular Structure Matching Approach. *Journal of chemical information*  
1387 *and modeling*. 2015;55 3:709-18.  
1388 158. Pence HE and Williams A. ChemSpider: an online chemical information resource. ACS  
1389 Publications, 2010.

Formatted: German (Germany)

52  
53  
54  
55  
56  
57  
58  
59  
60  
61  
62  
63  
64  
65

1  
2  
3  
4  
5  
6  
7  
1390 159. Kim S, Thiessen PA, Bolton EE, Chen J, Fu G, Gindulyte A, et al. PubChem substance and  
1391 compound databases. *Nucleic acids research*. 2015:gkv951.  
1392 160. Hastings J, Owen G, Dekker A, Ennis M, Kale N, Muthukrishnan V, et al. ChEBI in 2016:  
1393 Improved services and an expanding collection of metabolites. *Nucleic acids research*.  
1394 2015:gkv1031.  
1395 161. Gaulton A, Bellis LJ, Bento AP, Chambers J, Davies M, Hersey A, et al. ChEMBL: a large-scale  
1396 bioactivity database for drug discovery. *Nucleic acids research*. 2012;40 D1:D1100-D7.  
1397 162. Seiler KP, George GA, Happ MP, Bodycombe NE, Carrinski HA, Norton S, et al. ChemBank: a  
1398 small-molecule screening and cheminformatics resource database. *Nucleic acids research*.  
1399 2008;36 suppl 1:D351-D9.  
1400 163. Wishart DS, Jewison T, Guo AC, Wilson M, Knox C, Liu Y, et al. HMDB 3.0—the human  
1401 metabolome database in 2013. *Nucleic acids research*. 2012:gks1065.  
1402 164. Cui Q, Lewis IA, Hegeman AD, Anderson ME, Li J, Schulte CF, et al. Metabolite identification  
1403 via the Madison Metabolomics Consortium Database. *Nat Biotech*. 2008;26 2:162-4.  
1404 doi:[http://www.nature.com/nbt/journal/v26/n2/suppinfo/nbt0208-162\\_S1.html](http://www.nature.com/nbt/journal/v26/n2/suppinfo/nbt0208-162_S1.html).  
1405 165. Masciocchi J, Frau G, Fanton M, Sturlese M, Floris M, Pireddu L, et al. MMsINC: a large-scale  
1406 cheminformatics database. *Nucleic acids research*. 2009;37 suppl 1:D284-D90.  
1407 166. Afendi FM, Okada T, Yamazaki M, Hirai-Morita A, Nakamura Y, Nakamura K, et al. KNApSACK  
1408 family databases: integrated metabolite–plant species databases for multifaceted plant  
1409 research. *Plant and Cell Physiology*. 2012;53 2:e1-e.  
1410 167. Gu J, Gui Y, Chen L, Yuan G, Lu H-Z and Xu X. Use of Natural Products as Chemical Library for  
1411 Drug Discovery and Network Pharmacology. *PLoS One*. 2013;8 4:e62839.  
1412 doi:10.1371/journal.pone.0062839.  
1413 168. Arita M and Suwa K. Search extension transforms Wiki into a relational system: a case for  
1414 flavonoid metabolite database. *BioData mining*. 2008;1 1:7.  
1415 169. Sharma A, Dutta P, Sharma M, Rajput NK, Dodiya B, Georrg JJ, et al. BioPhytMol: a drug  
1416 discovery community resource on anti-mycobacterial phytomolecules and plant extracts.  
1417 *Journal of cheminformatics*. 2014;6 1:46.  
1418 170. Kumari S, Pundhir S, Priya P, Jeena G, Punetha A, Chawla K, et al. EssOilDB: a database of  
1419 essential oils reflecting terpene composition and variability in the plant kingdom. *Database*.  
1420 2014;2014:bau120.  
1421 171. Hummel J, Selbig J, Walther D and Kopka J. The Golm Metabolome Database: a database for  
1422 GC-MS based metabolite profiling. *Metabolomics*. Springer; 2007. p. 75-95.  
1423 172. Skogerson K, Wohlgemuth G, Barupal DK and Fiehn O. The volatile compound BinBase mass  
1424 spectral database. *BMC Bioinformatics*. 2011;12 1:321.  
1425 173. Horai H, Arita M, Kanaya S, Nihei Y, Ikeda T, Suwa K, et al. MassBank: a public repository for  
1426 sharing mass spectral data for life sciences. *Journal of Mass Spectrometry*. 2010;45 7:703-14.  
1427 174. Smith CA, O'Maille G, Want EJ, Qin C, Trauger SA, Brandon TR, et al. METLIN: a metabolite  
1428 mass spectral database. *Therapeutic drug monitoring*. 2005;27 6:747-51.  
1429 175. Cho K, Mahieu N, Ivanisevic J, Uritboonthai W, Chen Y-J, Siuzdak G, et al. isoMETLIN: a  
1430 database for isotope-based metabolomics. *Analytical Chemistry*. 2014;86 19:9358-61.  
1431 176. Wishart D, Arndt D, Pon A, Sajed T, Guo AC, Djoumbou Y, et al. T3DB: the toxic exposome  
1432 database. *Nucleic acids research*. 2015;43 D1:D928-D34.  
1433 177. Cuthbertson DJ, Johnson SR, Piljac-Zegarac J, Kappel J, Schäfer S, Wüst M, et al. Accurate  
1434 mass–time tag library for LC/MS-based metabolite profiling of medicinal plants.  
1435 *Phytochemistry*. 2013;91:187-97.  
1436 178. Sawada Y, Nakabayashi R, Yamada Y, Suzuki M, Sato M, Sakata A, et al. RIKEN tandem mass  
1437 spectral database (ReSpect) for phytochemicals: a plant-specific MS/MS-based data resource  
1438 and database. *Phytochemistry*. 2012;82:38-45.  
1439 179. Shahaf N, Rogachev I, Heinig U, Meir S, Malitsky S, Battat M, et al. The WEIZMASS spectral  
1440 library for high-confidence metabolite identification. *Nature communications*. 2016;7.

Field Code Changed

53  
54  
55  
56  
57  
58  
59  
60  
61  
62  
63  
64  
65

1  
2  
3  
4  
5  
6  
7  
8  
9  
10  
11  
12  
13  
14  
15  
16  
17  
18  
19  
20  
21  
22  
23  
24  
25  
26  
27  
28  
29  
30  
31  
32  
33  
34  
35  
36  
37  
38  
39  
40  
41  
42  
43  
44  
45  
46  
47  
48  
49  
50  
51  
52  
53  
54  
55  
56  
57  
58  
59  
60  
61  
62  
63  
64  
65

1441 180. Weber RJM, Li E, Bruty J, He S and Viant MR. MaConDa: a publicly accessible mass spectrometry contaminants database. *Bioinformatics*. 2012;28 21:2856-7. doi:10.1093/bioinformatics/bts527.

1442

1443

1444 181. Matsuda F, Hirai MY, Sasaki E, Akiyama K, Yonekura-Sakakibara K, Provart NJ, et al. AtMetExpress development: a phytochemical atlas of Arabidopsis development. *Plant Physiology*. 2010;152 2:566-78.

1445

1446

1447 182. Fukushima A, Kusano M, Mejia RF, Iwasa M, Kobayashi M, Hayashi N, et al. Metabolomic characterization of knockout mutants in Arabidopsis: development of a metabolite profiling database for knockout mutants in Arabidopsis. *Plant Physiology*. 2014;165 3:948-61.

1448

1449

1450 183. Moco S, Bino RJ, Vorst O, Verhoeven HA, de Groot J, van Beek TA, et al. A liquid chromatography-mass spectrometry-based metabolome database for tomato. *Plant Physiology*. 2006;141 4:1205-18.

1451

1452

1453 184. Brockmüller T, Ling Z, Li D, Gaquerel E, Baldwin IT and Xu S. Nicotiana attenuata Data Hub (Na DH): an integrative platform for exploring genomic, transcriptomic and metabolomic data in wild tobacco. *BMC genomics*. 2017;18 1:79.

1454

1455

1456 185. Colmsee C, Mascher M, Czauderna T, Hartmann A, Schlüter U, Zellerhoff N, et al. OPTIMAS-DW: a comprehensive transcriptomics, metabolomics, ionomics, proteomics and phenomics data resource for maize. *BMC plant biology*. 2012;12 1:245.

1457

1458

1459 186. Joshi T, Yao Q, Levi DF, Brechenmacher L, Valliyodan B, Stacey G, et al. SoyMetDB: the soybean metabolome database. In: *Bioinformatics and Biomedicine (BIBM), 2010 IEEE International Conference on 2010*, pp.203-8. IEEE.

1460

1461

1462 187. Iijima Y, Nakamura Y, Ogata Y, Tanaka Ki, Sakurai N, Suda K, et al. Metabolite annotations based on the integration of mass spectral information. *The Plant Journal*. 2008;54 5:949-62.

1463

1464 188. Matsuda F, Yonekura-Sakakibara K, Niida R, Kuromori T, Shinozaki K and Saito K. MS/MS spectral tag-based annotation of non-targeted profile of plant secondary metabolites. *The Plant Journal*. 2009;57 3:555-77.

1465

1466

1467 189. Hur M, Campbell AA, Almeida-de-Macedo M, Li L, Ransom N, Jose A, et al. A global approach to analysis and interpretation of metabolic data for plant natural product discovery. *Natural product reports*. 2013;30 4:565-83.

1468

1469

1470 190. Wurtele ES, Chappell J, Jones AD, Celiz MD, Ransom N, Hur M, et al. Medicinal plants: a public resource for metabolomics and hypothesis development. *Metabolites*. 2012;2 4:1031-59.

1471

1472

1473 191. Sud M, Fahy E, Cotter D, Azam K, Vadivelu I, Burant C, et al. Metabolomics Workbench: An international repository for metabolomics data and metadata, metabolite standards, protocols, tutorials and training, and analysis tools. *Nucleic acids research*. 2015:gkv1042.

1474

1475

1476 192. Haug K, Salek RM, Conesa P, Hastings J, de Matos P, Rijnbeek M, et al. MetabolLights—an open-access general-purpose repository for metabolomics studies and associated meta-data. *Nucleic acids research*. 2012:gks1004.

1477

1478

1479 193. Cook CE, Bergman MT, Finn RD, Cochrane G, Birney E and Apweiler R. The European Bioinformatics Institute in 2016: data growth and integration. *Nucleic acids research*. 2016;44 D1:D20-D6.

1480

1481

1482 194. Wang M, Carver JJ, Phelan VV, Sanchez LM, Garg N, Peng Y, et al. Sharing and community curation of mass spectrometry data with Global Natural Products Social Molecular Networking. *Nat Biotechnol*. 2016;34 8:828-37.

1483

1484

1485 195. Kanehisa M and Goto S. KEGG: kyoto encyclopedia of genes and genomes. *Nucleic acids research*. 2000;28 1:27-30.

1486

1487 196. Kelder T, Pico AR, Hanspers K, Van Iersel MP, Evelo C and Conklin BR. Mining biological pathways using WikiPathways web services. *PLoS One*. 2009;4 7:e6447.

1488

1489 197. Navas-Delgado I, García-Godoy MJ, López-Camacho E, Rybinski M, Reyes-Palomares A, Medina MÁ, et al. kpath: integration of metabolic pathway linked data. *Database*. 2015;2015:bav053.

1490

1491

Formatted: German (Germany)



1  
2  
3  
4  
5  
6  
7  
8  
9  
10  
11  
12  
13  
14  
15  
16  
17  
18  
19  
20  
21  
22  
23  
24  
25  
26  
27  
28  
29  
30  
31  
32  
33  
34  
35  
36  
37  
38  
39  
40  
41  
42  
43  
44  
45  
46  
47  
48  
49  
50  
51  
52  
53  
54  
55  
56  
57  
58  
59  
60  
61  
62  
63  
64  
65

1492 198. Caspi R, Foerster H, Fulcher CA, Kaipa P, Krummenacker M, Latendresse M, et al. The  
1493 MetaCyc Database of metabolic pathways and enzymes and the BioCyc collection of  
1494 Pathway/Genome Databases. *Nucleic acids research*. 2008;36 suppl 1:D623-D31.

1495 199. Arkin AP, Stevens RL, Cottingham RW, Maslov S, Henry CS, Dehal P, et al. The DOE Systems  
1496 Biology Knowledgebase (KBase). *bioRxiv*. 2016:096354.

1497 200. Schreiber F, Colmsee C, Czauderna T, Grafahrend-Belau E, Hartmann A, Junker A, et al.  
1498 MetaCrop 2.0: managing and exploring information about crop plant metabolism. *Nucleic  
1499 acids research*. 2011:gkr1004.

1500 201. Sucaet Y, Wang Y, Li J and Wurtele ES. MetNet Online: a novel integrated resource for plant  
1501 systems biology. *BMC Bioinformatics*. 2012;13 1:267.

1502 202. Tello-Ruiz MK, Stein J, Wei S, Preece J, Olson A, Naithani S, et al. Gramene 2016:  
1503 comparative plant genomics and pathway resources. *Nucleic acids research*. 2015:gkv1179.

1504 203. Ott MA and Vriend G. Correcting ligands, metabolites, and pathways. *BMC Bioinformatics*.  
1505 2006;7 1:517.

1506 204. Lang M, Stelzer M and Schomburg D. BKM-react, an integrated biochemical reaction  
1507 database. *BMC biochemistry*. 2011;12 1:42.

1508 205. Kumar A, Suthers PF and Maranas CD. MetRxn: a knowledgebase of metabolites and  
1509 reactions spanning metabolic models and databases. *BMC Bioinformatics*. 2012;13 1:6.

1510 206. Jeffries JG, Colastani RL, Elbadawi-Sidhu M, Kind T, Niehaus TD, Broadbelt LJ, et al. MINEs:  
1511 open access databases of computationally predicted enzyme promiscuity products for  
1512 untargeted metabolomics. *Journal of cheminformatics*. 2015;7 1:44.

1513 207. Zhou Z, Shen X, Tu J and Zhu Z-J. Large-Scale Prediction of Collision Cross-Section Values for  
1514 Metabolites in Ion Mobility-Mass Spectrometry. *Analytical Chemistry*. 2016;88 22:11084-91.

1515 208. Allard P-M, Péresse T, Bisson J, Gindro K, Marcourt L, Pham VC, et al. Integration of  
1516 molecular networking and in-silico MS/MS fragmentation for natural products dereplication.  
1517 *Analytical Chemistry*. 2016;88 6:3317-23.

1518 209. Palla P, Frau G, Vargiu L and Rodriguez-Tomé P. QTREDS: a Ruby on Rails-based platform for  
1519 omics laboratories. *BMC Bioinformatics*. 2014;15 1:S13.

1520 210. Hunter A, Dayalan S, De Souza D, Power B, Lorrimar R, Szabo T, et al. MASTR-MS: a web-  
1521 based collaborative laboratory information management system (LIMS) for metabolomics.  
1522 *Metabolomics*. 2017;13 2:14.

1523 211. Franceschi P, Mylonas R, Shahaf N, Scholz M, Arapitsas P, Masuero D, et al. MetaDB a data  
1524 processing workflow in untargeted MS-based metabolomics experiments. *Frontiers in  
1525 bioengineering and biotechnology*. 2014;2:72.

1526 212. Ara T, Enomoto M, Arita M, Ikeda C, Kera K, Yamada M, et al. Metablonote: a wiki-based  
1527 database for managing hierarchical metadata of metabolome analyses. *Frontiers in  
1528 bioengineering and biotechnology*. 2015;3:38.

1529 213. Wohlgemuth G, Mehta SS, Mejia RF, Neumann S, Pedrosa D, Pluskal T, et al. SPLASH, a  
1530 hashed identifier for mass spectra. *Nat Biotechnol*. 2016;34 11:1099-101.

1531 214. Redestig H, Kusano M, Fukushima A, Matsuda F, Saito K and Arita M. Consolidating  
1532 metabolite identifiers to enable contextual and multi-platform metabolomics data analysis.  
1533 *BMC Bioinformatics*. 2010;11 1:214.

1534 215. Wohlgemuth G, Haldiya PK, Willighagen E, Kind T and Fiehn O. The Chemical Translation  
1535 Service—a web-based tool to improve standardization of metabolomic reports.  
1536 *Bioinformatics*. 2010;26 20:2647-8.

1537 216. Carroll AJ, Zhang P, Whitehead L, Kaines S, Tcherkez G and Badger MR. PhenoMeter: a  
1538 metabolome database search tool using statistical similarity matching of metabolic  
1539 phenotypes for high-confidence detection of functional links. *Frontiers in bioengineering and  
1540 biotechnology*. 2015;3.

1541 217. Sartor MA, Ade A, Wright Z, Omenn GS, Athey B and Karnovsky A. Metab2MeSH: annotating  
1542 compounds with medical subject headings. *Bioinformatics*. 2012;28 10:1408-10.

Formatted: German (Germany)

- 1  
2  
3  
4  
5  
6  
7  
1543 218. Xu QW, Griss J, Wang R, Jones AR, Hermjakob H and Vizcaíno JA. jmzTab: A Java interface to  
1544 the mzTab data standard. *Proteomics*. 2014;14 11:1328-32.  
1545 219. Scheltema RA, Jankevics A, Jansen RC, Swertz MA and Breitling R. PeakML/mzMatch: a file  
1546 format, Java library, R library, and tool-chain for mass spectrometry data analysis. *Analytical*  
1547 *Chemistry*. 2011;83 7:2786-93.  
1548 220. Avtonomov DM, Raskind A and Nesvizhskii AI. BatMass: a Java Software Platform for LC-MS  
1549 Data Visualization in Proteomics and Metabolomics. *Journal of Proteome Research*. 2016;15  
1550 8:2500-9.  
1551 221. Tanaka S, Fujita Y, Parry HE, Yoshizawa AC, Morimoto K, Murase M, et al. Mass++: A  
1552 visualization and analysis tool for mass spectrometry. *Journal of Proteome Research*.  
1553 2014;13 8:3846-53.  
1554 222. Beisken S, Conesa P, Haug K, Salek RM and Steinbeck C. SpeckTackle: JavaScript charts for  
1555 spectroscopy. *Journal of cheminformatics*. 2015;7 1:17.  
1556 223. Stravs MA, Schymanski EL, Singer HP and Hollender J. Automatic recalibration and  
1557 processing of tandem mass spectra using formula annotation. *Journal of Mass Spectrometry*.  
1558 2013;48 1:89-99.  
1559 224. Dong Y, Li B and Aharoni A. More than Pictures: When MS Imaging Meets Histology. *Trends*  
1560 *in plant science*. 2016;21 8:686-98.  
1561 225. Wijetunge CD, Saeed I, Boughton BA, Spraggins JM, Caprioli RM, Bacic A, et al. EXIMS: an  
1562 improved data analysis pipeline based on a new peak picking method for EXploring Imaging  
1563 Mass Spectrometry data. *Bioinformatics*. 2015;31 19:3198-206.  
1564 226. Rübél O, Greiner A, Cholia S, Louie K, Bethel EW, Northen TR, et al. OpenMSI: a high-  
1565 performance web-based platform for mass spectrometry imaging. *Analytical Chemistry*.  
1566 2013;85 21:10354-61.  
1567 227. Husen P, Tarasov K, Katafiasz M, Sokol E, Vogt J, Baumgart J, et al. Analysis of lipid  
1568 experiments (ALEX): a software framework for analysis of high-resolution shotgun lipidomics  
1569 data. *PLoS One*. 2013;8 11:e79736.  
1570 228. Tsugawa H, Ohta E, Izumi Y, Ogiwara A, Yukihira D, Bamba T, et al. MRM-DIFF: data  
1571 processing strategy for differential analysis in large scale MRM-based lipidomics studies.  
1572 *Frontiers in genetics*. 2014;5.  
1573 229. Wong G, Chan J, Kingwell BA, Leckie C and Meikle PJ. LICRE: unsupervised feature correlation  
1574 reduction for lipidomics. *Bioinformatics*. 2014:btu381.  
1575 230. Herzog R, Schuhmann K, Schwudke D, Sampaio JL, Bornstein SR, Schroeder M, et al.  
1576 LipidXplorer: a software for consensual cross-platform lipidomics. *PLoS One*. 2012;7  
1577 1:e29851.  
1578 231. Haimi P, Uphoff A, Hermansson M and Somerharju P. Software tools for analysis of mass  
1579 spectrometric lipidome data. *Analytical Chemistry*. 2006;78 24:8324-31.  
1580 232. Blanchard AP, McDowell GS, Valenzuela N, Xu H, Gelbard S, Bertrand M, et al. Visualization  
1581 and Phospholipid Identification (VaLID): online integrated search engine capable of  
1582 identifying and visualizing glycerophospholipids with given mass. *Bioinformatics*. 2013;29  
1583 2:284-5.  
1584 233. Collins JR, Edwards BR, Fredricks HF and Van Mooy BA. LOBSTAHS: an adduct-based  
1585 lipidomics strategy for discovery and identification of oxidative stress biomarkers. *Analytical*  
1586 *Chemistry*. 2016;88 14:7154-62.  
1587 234. Ahmed Z, Mayr M, Zeeshan S, Dandekar T, Mueller MJ and Fekete A. Lipid-Pro: a  
1588 computational lipid identification solution for untargeted lipidomics on data-independent  
1589 acquisition tandem mass spectrometry platforms. *Bioinformatics*. 2015;31 7:1150-3.  
1590 235. Hartler J, Trötz Müller M, Chitraju C, Spener F, Köfeler HC and Thallinger GG. Lipid Data  
1591 Analyzer: unattended identification and quantitation of lipids in LC-MS data. *Bioinformatics*.  
1592 2011;27 4:572-7.

Formatted: German (Germany)

52  
53  
54  
55  
56  
57  
58  
59  
60  
61  
62  
63  
64  
65

1  
2  
3  
4  
5  
6  
7  
1593 236. Song H, Hsu F-F, Ladenson J and Turk J. Algorithm for processing raw mass spectrometric  
1594 data to identify and quantitate complex lipid molecular species in mixtures by data-  
1595 dependent scanning and fragment ion database searching. *Journal of the American Society  
1596 for Mass Spectrometry*. 2007;18 10:1848-58.  
1597 237. Sud M, Fahy E, Cotter D, Brown A, Dennis EA, Glass CK, et al. Lmsd: lipid maps structure  
1598 database. *Nucleic acids research*. 2007;35 suppl 1:D527-D32.  
1599 238. Watanabe K, Yasugi E and Oshima M. How to search the glycolipid data in “LIPIDBANK for  
1600 Web”, the newly developed lipid database in Japan. *Trends in Glycoscience and  
1601 Glycotechnology*. 2000;12 65:175-84.  
1602 239. Kind T, Liu K-H, Lee DY, DeFelice B, Meissen JK and Fiehn O. LipidBlast in silico tandem mass  
1603 spectrometry database for lipid identification. *Nature methods*. 2013;10 8:755-8.  
1604 240. Foster JM, Moreno P, Fabregat A, Hermjakob H, Steinbeck C, Apweiler R, et al. LipidHome: a  
1605 database of theoretical lipids optimized for high throughput mass spectrometry lipidomics.  
1606 *PLoS One*. 2013;8 5:e61951.  
1607 241. Aimo L, Liechti R, Nouspikel N, Niknejad A, Gleizes A, Götz L, et al. The SwissLipids  
1608 knowledgebase for lipid biology. *Bioinformatics*. 2015:btv285.  
1609 242. Tautenhahn R, Patti GJ, Rinehart D and Siuzdak G. XCMS Online: a web-based platform to  
1610 process untargeted metabolomic data. *Analytical Chemistry*. 2012;84 11:5035-9.  
1611 243. Grace SC, Embry S and Luo H. Haystack, a web-based tool for metabolomics research. *BMC  
1612 Bioinformatics*. 2014;15 11:S12.  
1613 244. Liang Y-J, Lin Y-T, Chen C-W, Lin C-W, Chao K-M, Pan W-H, et al. SMART: Statistical  
1614 Metabolomics Analysis An R Tool. *Analytical Chemistry*. 2016;88 12:6334-41.  
1615 245. Pluskal T, Castillo S, Villar-Briones A and Orešič M. MZmine 2: modular framework for  
1616 processing, visualizing, and analyzing mass spectrometry-based molecular profile data. *BMC  
1617 Bioinformatics*. 2010;11 1:395.  
1618 246. Wei X, Sun W, Shi X, Koo I, Wang B, Zhang J, et al. MetSign: a computational platform for  
1619 high-resolution mass spectrometry-based metabolomics. *Analytical Chemistry*. 2011;83  
1620 20:7668-75.  
1621 247. LaMarche BL, Crowell KL, Jaitly N, Petyuk VA, Shah AR, Polpitiya AD, et al. MultiAlign: a  
1622 multiple LC-MS analysis tool for targeted omics analysis. *BMC Bioinformatics*. 2013;14 1:49.  
1623 248. Carroll AJ, Badger MR and Millar AH. The MetabolomeExpress Project: enabling web-based  
1624 processing, analysis and transparent dissemination of GC/MS metabolomics datasets. *BMC  
1625 Bioinformatics*. 2010;11 1:376.  
1626 249. Fernández-Albert F, Llorach R, Andrés-Lacueva C and Perera A. An R package to analyse  
1627 LC/MS metabolomic data: MAIT (Metabolite Automatic Identification Toolkit).  
1628 *Bioinformatics*. 2014;30 13:1937-9.  
1629 250. Melamud E, Vastag L and Rabinowitz JD. Metabolomic analysis and visualization engine for  
1630 LC- MS data. *Analytical Chemistry*. 2010;82 23:9818-26.  
1631 251. Neuweger H, Albaum SP, Dondrup M, Persicke M, Watt T, Niehaus K, et al. MeltDB: a  
1632 software platform for the analysis and integration of metabolomics experiment data.  
1633 *Bioinformatics*. 2008;24 23:2726-32.  
1634 252. Xia J, Sinelnikov IV, Han B and Wishart DS. MetaboAnalyst 3.0—making metabolomics more  
1635 meaningful. *Nucleic acids research*. 2015;43 W1:W251-W7.  
1636 253. Kaever A, Landesfeind M, Feussner K, Mosblech A, Heilmann I, Morgenstern B, et al. MarVis-  
1637 Pathway: integrative and exploratory pathway analysis of non-targeted metabolomics data.  
1638 *Metabolomics*. 2015;11 3:764-77.  
1639 254. Edmands WM, Barupal DK and Scalbert A. MetMSLine: an automated and fully integrated  
1640 pipeline for rapid processing of high-resolution LC-MS metabolomic datasets. *Bioinformatics*.  
1641 2014:btu705.

Formatted: German (Germany)

51  
52  
53  
54  
55  
56  
57  
58  
59  
60  
61  
62  
63  
64  
65

1  
2  
3  
4  
5  
6  
7  
8  
9  
10  
11  
12  
13  
14  
15  
16  
17  
18  
19  
20  
21  
22  
23  
24  
25  
26  
27  
28  
29  
30  
31  
32  
33  
34  
35  
36  
37  
38  
39  
40  
41  
42  
43  
44  
45  
46  
47  
48  
49  
50  
51  
52  
53  
54  
55  
56  
57  
58  
59  
60  
61  
62  
63  
64  
65

255. Beisken S, Earll M, Portwood D, Seymour M and Steinbeck C. MassCascade: Visual Programming for LC-MS Data Processing in Metabolomics. *Molecular informatics*. 2014;33 4:307-10.

256. Winkler R. MASSyPup—an ‘Out of the Box’ solution for the analysis of mass spectrometry data. *Journal of Mass Spectrometry*. 2014;49 1:37-42.

257. Sakurai N, Ara T, Enomoto M, Motegi T, Morishita Y, Kurabayashi A, et al. Tools and databases of the KOMICS web portal for preprocessing, mining, and dissemination of metabolomics data. *BioMed Research International*. 2014;2014.

258. Sakurai T, Yamada Y, Sawada Y, Matsuda F, Akiyama K, Shinozaki K, et al. PRIME update: innovative content for plant metabolomics and integration of gene expression and metabolite accumulation. *Plant and Cell Physiology*. 2013;54 2:e5-e.

259. Henry VJ, Bandrowski AE, Pepin A-S, Gonzalez BJ and Desfeux A. OMICtools: an informative directory for multi-omic data analysis. *Database*. 2014;2014:bau069.

260. Gentleman RC, Carey VJ, Bates DM, Bolstad B, Dettling M, Dudoit S, et al. Bioconductor: open software development for computational biology and bioinformatics. *Genome Biology*. 2004;5 10:R80. doi:10.1186/gb-2004-5-10-r80.

261. Sumner LW, Amberg A, Barrett D, Beale MH, Beger R, Daykin CA, et al. Proposed minimum reporting standards for chemical analysis. *Metabolomics*. 2007;3 3:211-21. doi:10.1007/s11306-007-0082-2.

262. Gago J, Daloso DdM, Figueroa CM, Flexas J, Fernie AR and Nikoloski Z. Relationships of Leaf Net Photosynthesis, Stomatal Conductance, and Mesophyll Conductance to Primary Metabolism: A Multispecies Meta-Analysis Approach. *Plant Physiology*. 2016;171 1:265-79. doi:10.1104/pp.15.01660.

**Figure 1** Typical mass spectrometry based metabolomics workflow.

**Additional file 1.xls** Summary of resources for mass spectrometry based metabolomics.

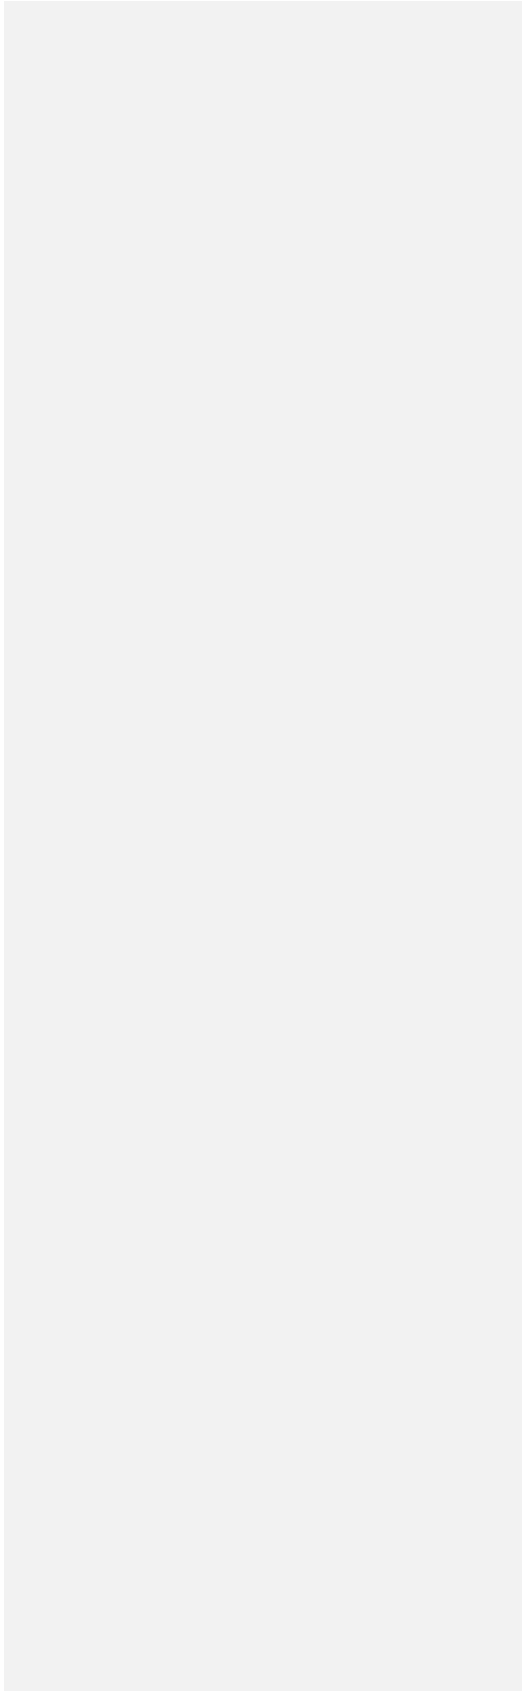

## Sample Preparation

## Data Acquisition

### Processing

- Feature detection
- Alignment
- Quantification
- Spectra deconvolution
- Normalization

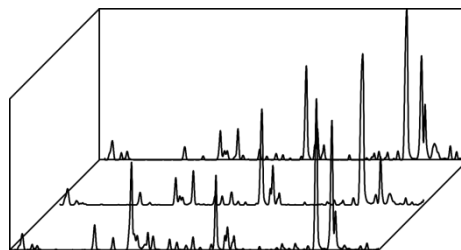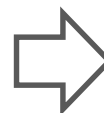

### Features

Samples

Intensities

### Compound Spectra

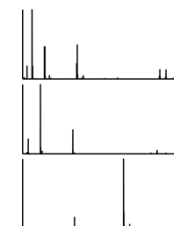

### Statistical Analysis

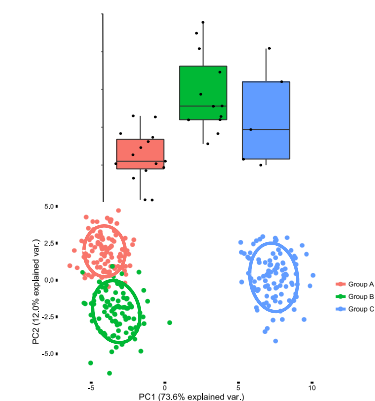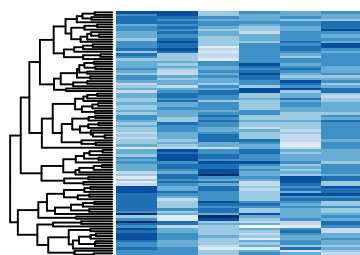

### Annotation

- Exact mass
- MS<sup>n</sup>
- Spectra matching
- *In silico* prediction

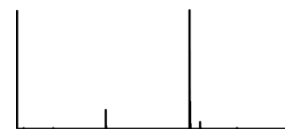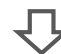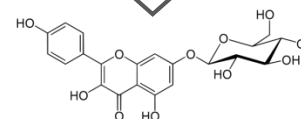

### Databases

- Compounds
- Mass spectra
- Samples
- Pathway

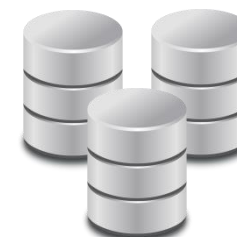

### Interpretation

- Network structure
- Pathway enrichment
- Integration

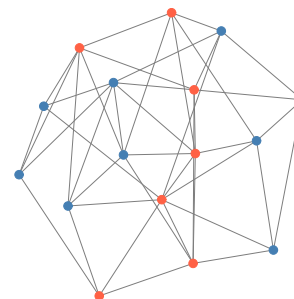



Click here to access/download  
**Supplementary Material**  
Databases\_ Revised.xls



Supplement: gix037_giga-d-17-00039_revision-1.pdf [file gix037_giga-d-17-00039_revision-1.pdf]
