# Supplementary material for: From chromatogram to analyte to metabolite. How to pick horses for courses from the massive web resources for mass spectral plant metabolomics
Source: PubMed Central journal article supplement (PMC5499862; doi:10.1093/gigascience/gix037), 2017-05-17
Supplement: gix037_reviewer_1_report_(revision-1).pdf [file gix037_reviewer_1_report_%28revision-1%29.pdf]

Cancel

Save and Close

**GIGA-D-17-00039R1****"From chromatogram to analyte to metabolite. How to pick horses for courses from the massive web-resources for mass spectral plant metabolomics"****Revision 1****Hiroshi Tsugawa (Reviewer 1)**

|                                                                                                                                                                                                                                                                                                                                                                                                                                                                                                                                                                                                                                                                                                                                                                                                                                                                                                                                                                                                                                                                                                                                                                                                                                               |                                                                                         |
|-----------------------------------------------------------------------------------------------------------------------------------------------------------------------------------------------------------------------------------------------------------------------------------------------------------------------------------------------------------------------------------------------------------------------------------------------------------------------------------------------------------------------------------------------------------------------------------------------------------------------------------------------------------------------------------------------------------------------------------------------------------------------------------------------------------------------------------------------------------------------------------------------------------------------------------------------------------------------------------------------------------------------------------------------------------------------------------------------------------------------------------------------------------------------------------------------------------------------------------------------|-----------------------------------------------------------------------------------------|
| <b>Reviewer Recommendation Term:</b>                                                                                                                                                                                                                                                                                                                                                                                                                                                                                                                                                                                                                                                                                                                                                                                                                                                                                                                                                                                                                                                                                                                                                                                                          | Accept                                                                                  |
| <b>Rate Review:</b>                                                                                                                                                                                                                                                                                                                                                                                                                                                                                                                                                                                                                                                                                                                                                                                                                                                                                                                                                                                                                                                                                                                                                                                                                           | <input type="text"/> Please enter a number from 1-100 to rate this review (100 is best) |
| <b>Custom Review Question(s)</b>                                                                                                                                                                                                                                                                                                                                                                                                                                                                                                                                                                                                                                                                                                                                                                                                                                                                                                                                                                                                                                                                                                                                                                                                              | <b>Response</b>                                                                         |
| <b>Level of interest</b><br>Please indicate how interesting you found the manuscript:                                                                                                                                                                                                                                                                                                                                                                                                                                                                                                                                                                                                                                                                                                                                                                                                                                                                                                                                                                                                                                                                                                                                                         | An article of importance in its field                                                   |
| <b>Quality of written English</b><br>Please indicate the quality of language in the manuscript:                                                                                                                                                                                                                                                                                                                                                                                                                                                                                                                                                                                                                                                                                                                                                                                                                                                                                                                                                                                                                                                                                                                                               | Acceptable                                                                              |
| <b>Declaration of competing interests</b><br>Please complete a declaration of competing interests, considering the following questions:<br><br><ol style="list-style-type: none"> <li>1. Have you in the past five years received reimbursements, fees, funding, or salary from an organisation that may in any way gain or lose financially from the publication of this manuscript, either now or in the future?</li> <li>2. Do you hold any stocks or shares in an organisation that may in any way gain or lose financially from the publication of this manuscript, either now or in the future?</li> <li>3. Do you hold or are you currently applying for any patents relating to the content of the manuscript?</li> <li>4. Have you received reimbursements, fees, funding, or salary from an organization that holds or has applied for patents relating to the content of the manuscript?</li> <li>5. Do you have any other financial competing interests?</li> <li>6. Do you have any non-financial competing interests in relation to this paper?</li> </ol> <p>If you can answer no to all of the above, write 'I declare that I have no competing interests' below. If your reply is yes to any, please give details below.</p> | I declare that I have no competing interests.                                           |
| I agree to the open peer review policy of the journal. I understand that my name will be included on my report to the authors and, if the manuscript is accepted for publication, my named report including any attachments I upload will be posted on the website along with the authors' responses. I agree for my report to be made available under an Open Access Creative Commons CC-BY license ( <a href="http://creativecommons.org/licenses/by/4.0/">http://creativecommons.org/licenses/by/4.0/</a> ). I understand that any comments which I do not wish to be included in my named report can be included as confidential comments to the editors, which will not be published.                                                                                                                                                                                                                                                                                                                                                                                                                                                                                                                                                    | <input type="checkbox"/> I agree to the open peer review policy of the journal          |
| To further support our reviewers, we have joined with Publons, where you can gain additional credit to further highlight your hard work (see: <a href="https://publons.com/journal/530/gigascience">https://publons.com/journal/530/gigascience</a> ). On publication of this paper, your review will be automatically                                                                                                                                                                                                                                                                                                                                                                                                                                                                                                                                                                                                                                                                                                                                                                                                                                                                                                                        | Yes                                                                                     |

added to Publons, you can then choose whether or not to claim your Publons credit. I understand this statement.

**Comments to Editor:**

I recommend to accept this paper to be published.

**Comments to Author:**

Your effort was great. Thanks,

[More Reviewer Details](#)

Cancel

Save and Close
